# 1 **Selective modulation of cell surface proteins during vaccinia** 2 **infection: implications for immune evasion strategies**

3

4 Delphine M Depierreux<sup>1\*</sup>, Arwen F Altenburg<sup>1\*</sup>, Lior Soday<sup>2</sup>, Alice Fletcher-Etherington<sup>2</sup>,  
5 Robin Anthrobus<sup>2</sup>, Brian J Ferguson<sup>1</sup>, Michael P Weekes<sup>2\$</sup>, & Geoffrey L Smith<sup>1\$</sup>

6

7 <sup>1</sup> Department of Pathology, University of Cambridge, United Kingdom

8 <sup>2</sup> Cambridge Institute for Medical Research, University of Cambridge, United Kingdom

9

10 \* Authors contributed equally to this study

11 \$ Joint corresponding authors: [gls37@cam.ac.uk](mailto:gls37@cam.ac.uk); [mpw1001@cam.ac.uk](mailto:mpw1001@cam.ac.uk)

12

13

## 14 **Abstract**

15 The interaction between immune cells and virus-infected targets involves multiple plasma  
16 membrane (PM) proteins. A systematic study of PM protein modulation by vaccinia virus  
17 (VACV), the paradigm of host regulation, has the potential to reveal not only novel viral  
18 immune evasion mechanisms, but also novel factors critical in host immunity. Here, >1000  
19 PM proteins were quantified throughout VACV infection, revealing selective downregulation of  
20 known T and NK cell ligands including HLA-C, downregulation of cytokine receptors including  
21 IFNAR2, IL-6ST and IL-10RB, and rapid inhibition of expression of certain protocadherins and  
22 ephrins, candidate activating immune ligands. Downregulation of most PM proteins occurred  
23 via a proteasome-independent mechanism. Upregulated proteins included a decoy receptor  
24 for TRAIL. Twenty VACV-encoded PM proteins were identified, of which five were not  
25 recognised previously as such. Collectively, this dataset constitutes a valuable resource for  
26 future studies on antiviral immunity, host-pathogen interaction, poxvirus biology, vector-based  
27 vaccine design and oncolytic therapy.

## 28 **Introduction**

29 Vaccinia virus (VACV) is a large, double-stranded (ds)DNA virus and is best known as the live  
30 vaccine used to eradicate smallpox (1). Since smallpox eradication in 1980, research with  
31 VACV has continued because it is an excellent model to study host-pathogen interactions.  
32 Furthermore, VACV was developed as an expression vector (2, 3) with utility as a vaccine  
33 against other infectious diseases (4-6) and as an oncolytic agent (7, 8). To optimise the design  
34 of VACV-based vaccines and oncolytic agents, it is important to develop a comprehensive  
35 understanding of the interactions between VACV-infected cells and the host immune system,  
36 and how VACV modulates these interactions. The study of virus-induced changes to cellular  
37 proteins has also led to several advances in understanding of host cell protein function. A  
38 recent example of this was our demonstration that histone deacetylase 4 (HDAC4) is degraded  
39 during VACV infection (9), is needed for the recruitment of STAT2 to the interferon (IFN)-  
40 stimulated response element during type I IFN-induced signalling and restricts the replication  
41 of VACV and herpes simplex virus type 1 (10).

42

43 VACV encodes many immunomodulatory proteins that function to evade or suppress the host  
44 immune response to infection (11). Intracellular immunomodulators may inhibit innate immune  
45 signalling pathways, the activity of IFN-stimulated gene (ISG) products, or block apoptosis  
46 (12, 13). Secreted proteins can bind and inhibit cytokines, chemokines, IFNs or complement  
47 factors. Additional immunomodulators function on the cell surface to influence recognition of  
48 the infected cell by the immune system. In general, these have been studied less extensively  
49 than secreted or intracellular proteins. Nonetheless, it was reported that the viral  
50 haemagglutinin (HA, protein A56) modulates interactions with natural killer (NK) cells (14), and  
51 A40 is a cell surface protein with a type II membrane topology, with limited amino acid similarity  
52 to C-type lectins and NK cell receptors (15). In addition to these integral membrane proteins,  
53 some VACV secreted proteins can also bind to the surface of infected or uninfected cells.  
54 Examples include the type I IFN-binding protein (B18 in VACV strain Western Reserve – WR)  
55 that binds to cell surface glycosaminoglycans (16, 17) and the M2 protein that binds to B7.1

56 and B7.2 to prevent T cell activation (18, 19). The vaccinia complement control protein C3  
57 (VCP) and the K2 serine protease inhibitor (serpin 3, SPI-3) each bind to A56 (20), and  
58 vaccinia epidermal growth factor (VGF) binds to the epidermal growth factor receptor and  
59 promotes cell division (21) and affects virus spread (22). Other VACV proteins present on the  
60 infected cell surface are part of the outer envelope of the extracellular enveloped virus (EEV)  
61 (23).

62

63 In addition to VACV proteins expressed at the cell surface, there have been a few reports of  
64 changes to cellular plasma membrane (PM) proteins during infection. For instance, the  
65 abundance of different MHC class I haplotypes, a major immune ligand, have been reported  
66 to change during infection and this might influence recognition of infected cells by both CD8<sup>+</sup>  
67 cytotoxic T lymphocytes and NK cells (24-27). However, changes in cell surface protein  
68 expression during VACV infection have not been addressed comprehensively or  
69 systematically.

70

71 This study used plasma membrane profiling (PMP) (28, 29) to provide a comprehensive  
72 analysis of temporal and quantitative changes in host and viral proteins at the surface of  
73 immortalised human foetal foreskin fibroblasts (HFFF-TERTs) following VACV infection. Using  
74 tandem mass-tag (TMT)-based proteomics of PM-enriched fractions, >1000 PM proteins were  
75 quantified, and of these, 142 were downregulated and 113 were upregulated during infection.  
76 Twenty VACV proteins were detected at the cell surface including C8 and F5, which were not  
77 known to be present at the PM. Modulation of the expression levels of PM proteins indicated  
78 several possible novel immune evasion strategies, including selective downregulation of HLA-  
79 C and the IFN- $\alpha$  receptor 2 (IFNAR2) and upregulation of an apoptosis decoy receptor for  
80 TRAIL. The use of a proteasome inhibitor and comparison with previous studies assessing  
81 whole cell protein expression during VACV infection (9) and protein stability (30) in HFFF-  
82 TERTs suggested that proteasomal degradation and host protein synthesis shut-off are not  
83 the major mechanisms by which PM proteins are downregulated during VACV infection, and

84 that most PM proteins are likely upregulated through subcellular translocation and/or  
85 stabilisation at the PM. Finally, a comparative analysis with a dataset examining cell surface  
86 proteomic changes upon infection of HFFF-TERTs with human cytomegalovirus (HCMV) (31)  
87 identified possible common viral immune evasion strategies.

88

## 89 **Results**

### 90 Quantitative temporal analysis of the plasma membrane proteome during VACV infection

91 To measure how VACV infection changes the cell surface proteome, HFFF-TERTs were  
92 mock-treated or infected with VACV WR in biological duplicate. These cells were used  
93 previously in an investigation of the whole cell proteome during VACV infection (9) and the  
94 whole cell lysate (WCL) and PM proteomes during HCMV infection (29), thereby enabling  
95 direct comparisons with these datasets. Additionally, a single mock and an infected sample  
96 were treated with the proteasome inhibitor MG132 at 2 hours post-infection (hpi). Flow  
97 cytometry confirmed that >95% of the cells were infected (**Figure S1A-B**). Multiplexed TMT  
98 and triple-stage mass spectrometry (MS3) were used to quantify the relative abundance of  
99 PM proteins at 1.5, 6, 12 and 18 hpi (**Figure 1A**).

100

101 Human proteins were filtered for gene ontology (GO) annotations related to PM expression.  
102 Overall, 49 VACV proteins and 1055 human PM proteins were quantified in both experiments  
103 (**Figure 1B**). Mock-infected samples presented negligible variation in the abundance of any  
104 given protein over the course of the experiment (**Figure S1C**). VACV-infection induced  
105 selective changes in the expression of PM proteins, with the greatest fold-change (FC)  
106 occurring mostly late during infection (**Figure 1C-D**). This was reflected by separate clustering  
107 of mock samples, and samples harvested early (1.5 & 6 hpi) or late (12 & 18 hpi) after VACV  
108 infection (**Figure 1C**). All data are shown in **Table S1**, in which the worksheet “Plotter” enables  
109 interactive generation of temporal graphs of the expression of each human or viral proteins  
110 quantified.

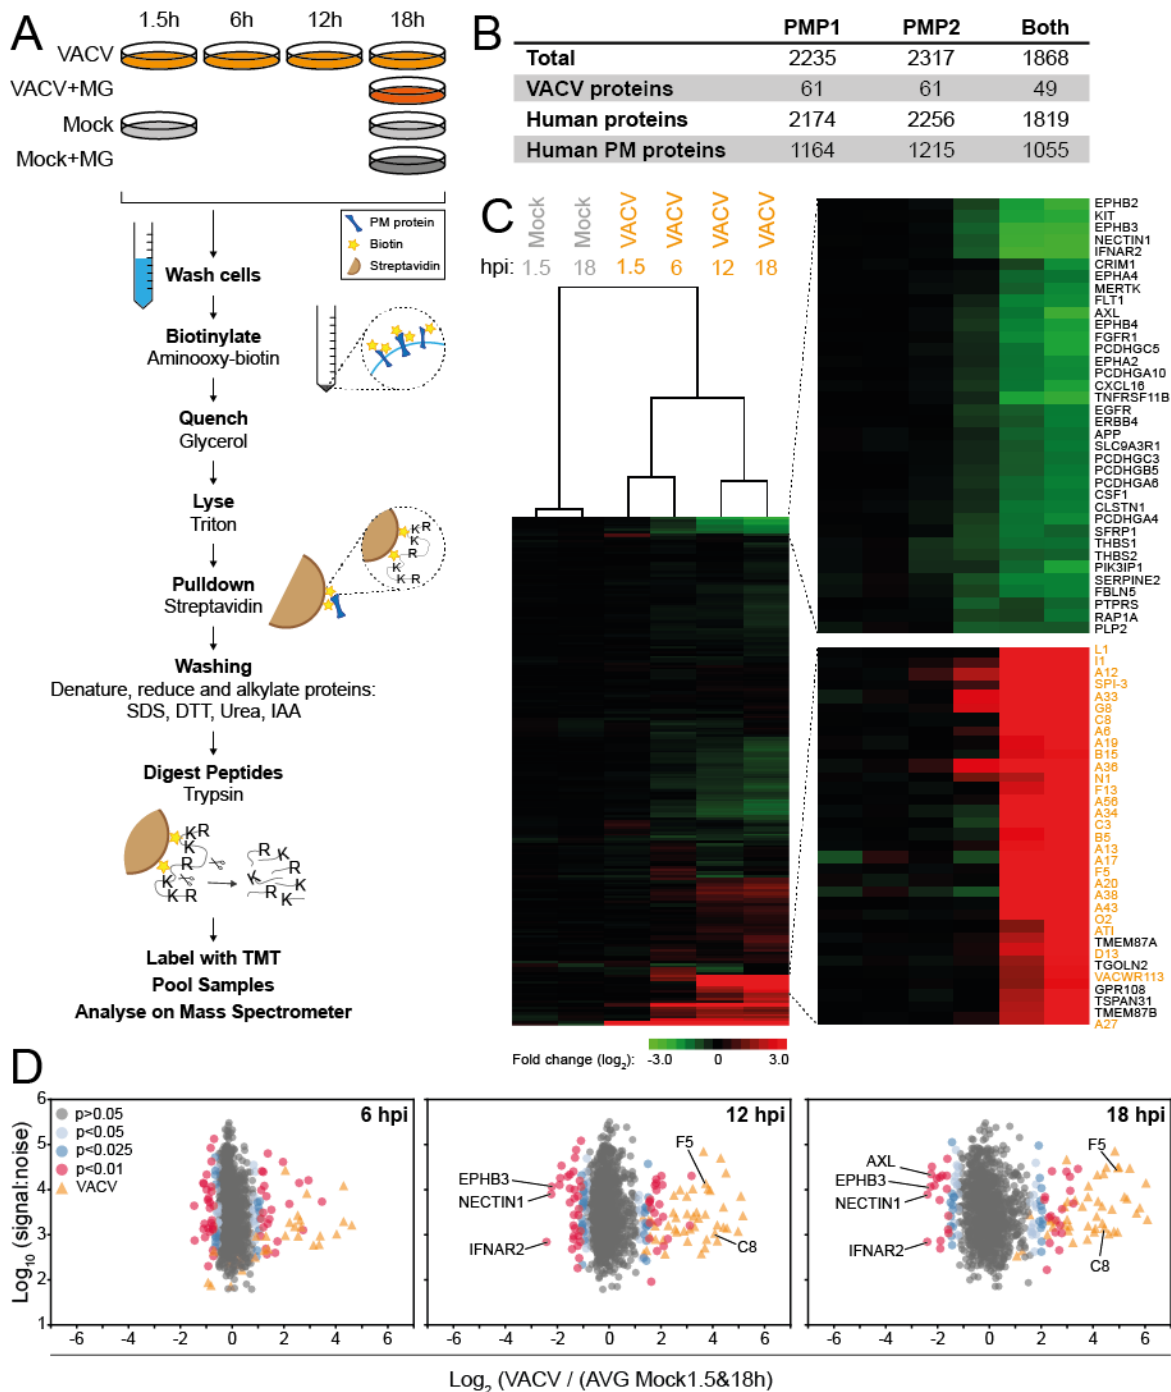

111

112 **Figure 1. Quantitative temporal analysis of the plasma membrane proteome during VACV infection. (A)**

113 Schematic of the experimental workflow. HFFF-TERTs were mock-treated or infected with VACV at MOI 5 for the

114 indicated time-points (**Fig. S1A-B**). At 2 hpi MG132 was added to a mock and an infected sample ('+MG'). Samples

115 were generated in biological duplicate (PMP1, PMP2). (**B**) Number of proteins quantified in the PMP replicates.

116 'Human PM proteins' represents the number of proteins annotated with relevant GO terms (PM, 'cell surface' [CS],

117 'extracellular' [XC] and 'short GO' [ShG, 4-part term containing 'integral to membrane', 'intrinsic to membrane',

118 'membrane part', 'cell part' or a 5-part term additionally containing 'membrane']). (**C**) Hierarchical cluster analysis

119 showing the fold change of all VACV and human proteins quantified in both replicates compared to mock (average

120 1.5 and 18 h, **Fig. S1C**). Selected sections are shown enlarged and VACV proteins are indicated in orange. (**D**)

121 Scatter plots of all VACV and human PM proteins quantified in both repeats at 6, 12 or 18 hpi. Selected human PM

122 proteins were annotated. P-values were estimated using significance A with Benjamini-Hochberg correction for

123 multiple hypothesis testing (32).

124

125 Selective changes in human cell surface protein expression following VACV infection

126 Two sets of criteria were defined to determine which human PM proteins showed altered levels  
127 during VACV infection (**Figure 2A, Table S2A-D**). First, 'sensitive' criteria included proteins  
128 quantified in either or both PMP replicates showing >2-fold change (FC) at any time-point  
129 during infection. Second, 'stringent' criteria included only proteins detected in both PMP  
130 replicates showing >2 FC with a p-value <0.05 (Benjamini-Hochberg corrected one-way  
131 ANOVA). Both criteria indicated that VACV infection selectively alters the abundance of a  
132 small fraction (~1%) of human PM proteins detected in this study (**Figure 2A, Table S2A-D**).  
133 Sensitive criteria were used for subsequent analyses and proteins identified by stringent  
134 criteria are shown where appropriate in supplementary tables.

135

136 Of the 1055 human PM proteins quantified in both PMP replicates, 142 and 113 proteins were  
137 down- or upregulated, respectively (**Figure 2A, Table S2A-B**). The Database for Annotation,  
138 Visualization and Integrated Discovery (DAVID) (33, 34) identified six functional clusters that  
139 were enriched within the group of downregulated human PM proteins (**Figure 2B, Table S2E**).  
140 This included protocadherins and several clusters associated with receptor tyrosine kinases  
141 (RTKs), which contain immunoglobulin domains (growth factor receptor families), fibronectin  
142 type III domains (ephrin family), or a combination of the two (TAM family) (35). Temporal  
143 profiles provide insight into the kinetics of downregulation from the cell surface (this dataset)  
144 and as determined by WCL proteomics of VACV-infected cells (9) (**Figure 2C**).  
145 Downregulation of ephrin B4 (EPHB4) and epidermal growth factor receptor (EGFR) was  
146 confirmed by flow cytometry (**Figure 2D**).

147

148 DAVID functional enrichment analysis for the group of upregulated human PM proteins  
149 resulted in a single significantly enriched cluster: 'Protein processing in the endoplasmic  
150 reticulum (ER)' (**Table S2F**). The most highly upregulated proteins included many ER, Golgi  
151 and lysosomal proteins, such as trans-Golgi network integral membrane protein (TGOLN)2,

152 heat shock protein (HSP)A5, calreticulin (CALR) and ER aminopeptidase (ERAP)1 (**Figure**  
153 **2E**).

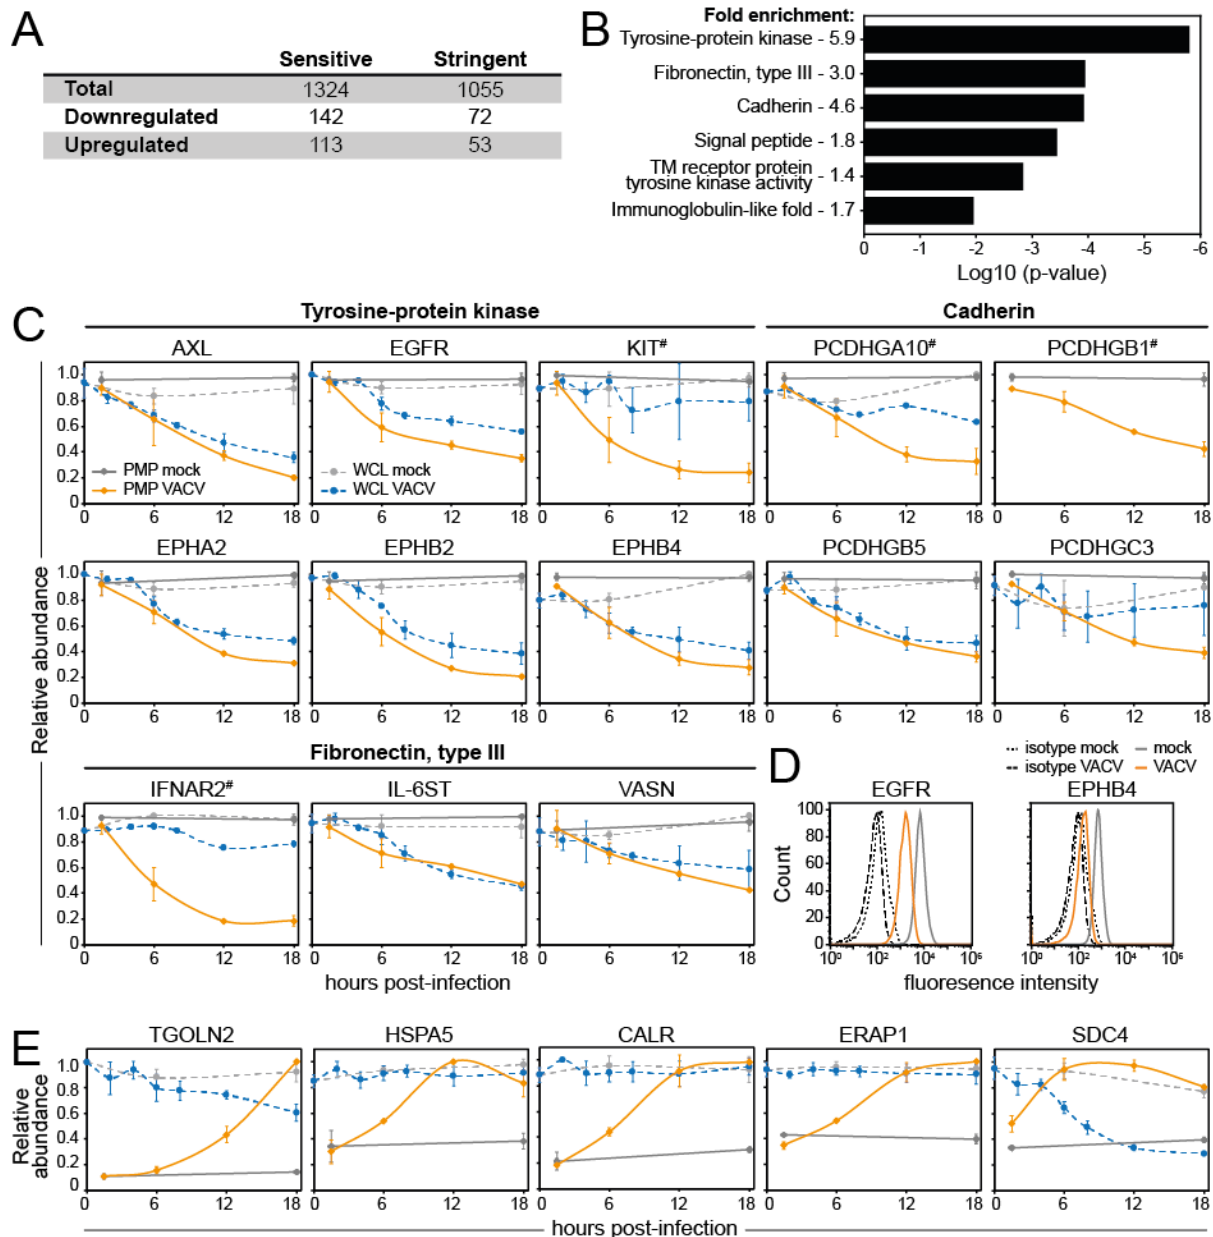

154  
155 **Figure 2. Selective modulation of host proteins at the cell surface during VACV infection.** (A) Human host  
156 PM modulated according to the sensitive and stringent criteria (**Table S2A-D**). (B) DAVID functional enrichment of  
157 142 proteins detected in either repeat and downregulated >2-fold. A background of all quantified human PM  
158 proteins was used. Representative terms are shown for each cluster with a Benjamini-Hochberg-corrected p-value  
159 <0.05 (**Table S2E**). (C) Temporal profiles of selected downregulated proteins, in which the fold-change for  
160 downregulation was in each case significant at p<0.05 (Benjamini-Hochberg-corrected one-way ANOVA, **Table**  
161 **S2A/C**). (D) Downregulation of EGFR/EPHB4 during VACV infection was confirmed by flow cytometry at 15 hpi  
162 with VACV (MOI 5). Results are representative of 3 independent experiments. (E) Temporal profiles of selected  
163 upregulated proteins, all with p <0.05 (Benjamini-Hochberg-corrected one-way ANOVA, **Table S2B/D**). Data are  
164 represented as mean  $\pm$  SD (PMP n=2; WCL (9) n=3, # WCL n<3).

165 Interestingly, several host surface proteins involved with the cytokine response were  
166 modulated during VACV infection. For example, the interleukin-6 receptor subunit  $\beta$  (IL-6ST),  
167 interferon  $\alpha/\beta$  receptor 2 (IFNAR2), mast/stem cell growth factor receptor Kit (KIT) (**Figure 2C**)  
168 and interleukin-10 receptor subunit  $\beta$  (IL-10RB, **Table S1**) were substantially downregulated  
169 from the PM during VACV infection. Conversely, PM expression of several proteins involved  
170 in the suppression of the cytokine response, including CALR, ERAP1 and syndecan-4 (SDC4),  
171 were upregulated (**Figure 2E**). Overall, PM expression modulation of these proteins may  
172 indicate novel strategies by which VACV manipulates the cytokine environment to enhance  
173 immune evasion, replication or spread.

174

#### 175 Selective modulation of cell surface immune ligands during VACV infection

176 NK and T cells are essential components of the antiviral immune response. Their activation  
177 status is determined by the integration of inhibitory and activating signals emanating from  
178 receptors engaging with ligands expressed by (infected) target cells. Interestingly, several of  
179 these immune ligands showed altered PM expression during VACV infection.

180

181 Major histocompatibility complex class I (MHC-I, human leukocyte antigen class I (HLA) in  
182 humans) molecules are important activators and regulators of NK and T cells. Due to the  
183 polymorphic nature of classical HLA-I (HLA-A, -B, -C), their peptides may easily be miss-  
184 assigned after detection by mass spectrometry. Therefore, only peptides corresponding  
185 uniquely to a single HLA-I type were included in this analysis. Interestingly, HLA-A and HLA-  
186 B were modestly downregulated whilst HLA-C was substantially downregulated (**Figure 3A**).  
187 This selective modulation was observed at both the cell surface and whole cell level and was  
188 further confirmed by flow cytometry in two different cell lines (**Figure 3B-C**). Given that all  
189 HLA-C subtypes are ligands for killer-cell immunoglobulin-like receptors (KIRs) expressed by  
190 NK cells, and less than 50% of the HLA-A/B subtypes can bind KIRs (36), these data suggest  
191 selective modulation of the NK cell response during VACV infection.



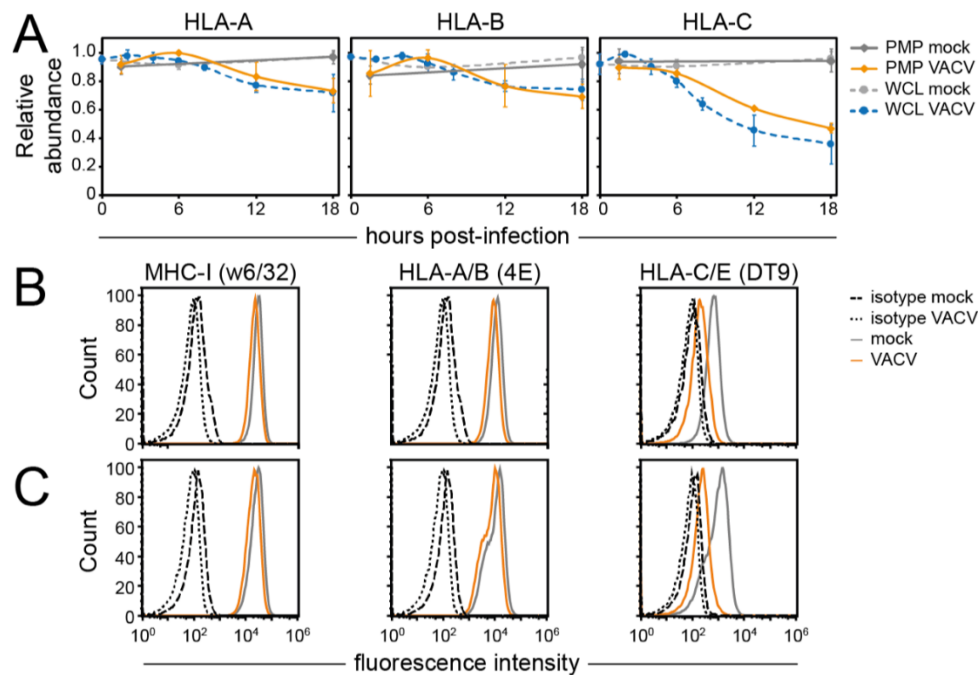

192

193 **Figure 3. Selective downregulation of HLA-C from the PM during VACV infection.** (A) Temporal profiles were  
 194 generated only using peptides belonging uniquely to each of the indicated HLA-I heavy chains. Data are  
 195 represented as mean  $\pm$  SD (PMP n=2; WCL (9) n=3, # WCL n<3). (B-C) Cell surface downregulation of selected  
 196 proteins during VACV infection (MOI 5) was confirmed by flow cytometry in HFFF-TERTs (B) or HeLa cells (C) at  
 197 15-18hpi. Results are representative of at least 2 independent experiments.

198

199 Enhanced PM expression of stress molecules such as NK activating ligands MHC class I  
 200 polypeptide related sequence (MIC)A/B, UL-16-binding proteins (ULBPS) and B7-H6  
 201 represents a conserved cellular response to stress, including viral infection (37-39). However,  
 202 the PM expression level of these proteins remained largely unchanged during VACV infection,  
 203 which was confirmed by flow cytometry (**Figure 4A**). This may represent a new VACV strategy  
 204 to evade immune recognition.

205

206 Selective modulation of regulators of lymphocyte-mediated apoptosis was observed during  
 207 VACV infection. Downregulation of lymphotoxin- $\beta$  receptor (LTBR) and tumour necrosis factor  
 208 receptor superfamily member (TNFRSF) 1A (TNFR1), as well as upregulation of TNFRSF10D  
 209 (TRAIL-R4), a decoy receptor for TNF-related apoptosis-inducing ligand (TRAIL), may lead to  
 210 decreased sensitivity to apoptosis (**Figure 4B**). Upregulation of TNFRSF10D was confirmed  
 211 by flow cytometry (**Figure 4B**). Conversely, upregulation of apoptosis inducer and NF- $\kappa$ B  
 212 activator TNFRSF12A (Fn14) (**Figure 4B**) may sensitise the infected cell to lymphocyte-

213 induced apoptosis. Expression levels of other surface proteins involved in apoptosis  
214 regulation, including FAS and TNFRSF10A/-B, remained largely unchanged (**Figure 4B, S2**).

215

216 Immune checkpoints are activating and inhibitory pathways that regulate the delicate balance  
217 between lymphocyte activation and maintenance of self-tolerance. During VACV infection, the  
218 levels of inhibitory checkpoint molecules programmed cell death ligand (PD-L)1, PD-L2 and  
219 B7-H3 were stable (**Figure 4C, S2**). The temporal profile of activating checkpoint molecule  
220 CD40 also remained mostly unchanged (**Figure 4C**). In contrast, repulsive guidance molecule  
221 B (RGMB), which has both stimulatory and inhibitory functions, was downregulated from the  
222 PM (**Figure S2E**). Additionally, inducible costimulatory ligand (ICOSLG) was downregulated  
223 from the cell surface, which was confirmed by flow cytometry (**Figure 4C**).

224

225 Other noteworthy changes in the surface proteome during VACV infection include the  
226 upregulation of collectin-1 (COLEC12), a ligand for the inhibitory NK receptor paired  
227 immunoglobulin-like type 2 receptor  $\alpha$  (PILR $\alpha$ , **Figure S2F**). Furthermore, NECTIN-1, a ligand  
228 for the CD96 receptor with both inhibitory and stimulatory properties, was substantially  
229 downregulated. Other related proteins such as poliovirus receptor (PVR or CD155), NECTIN-  
230 2 and NECTIN-3 remained unchanged, suggesting that NECTIN-1 is targeted selectively by  
231 VACV. These changes may represent previously unrecognised NK cell immunomodulatory  
232 strategies employed by VACV. Conversely, modulation of surface expression levels of  
233 activating ligand vimentin (VIM, **Figure S2E**), may reflect the host antiviral response and  
234 enhance sensitivity to NK cell killing.

235

236 Lymphocytes rely on adhesion molecules to make contact with surrounding cells and  
237 determine whether they are targets to be eliminated. Six such molecules were quantified in  
238 the PMP replicates and showed only moderate downregulation for cadherin (CDH)2 and  
239 CDH4 (**Figure S2**). Natural cytotoxicity receptor (NCR) ligands and CD47, a ligand for signal  
240 regulatory protein alpha (SIRP- $\alpha$ ), remained largely unchanged during VACV infection (**Figure**

241 **S2)**. Lastly, plexins, which are ligands for semaphorins, showed mild downregulation from the  
 242 cell surface (**Figure S2**).

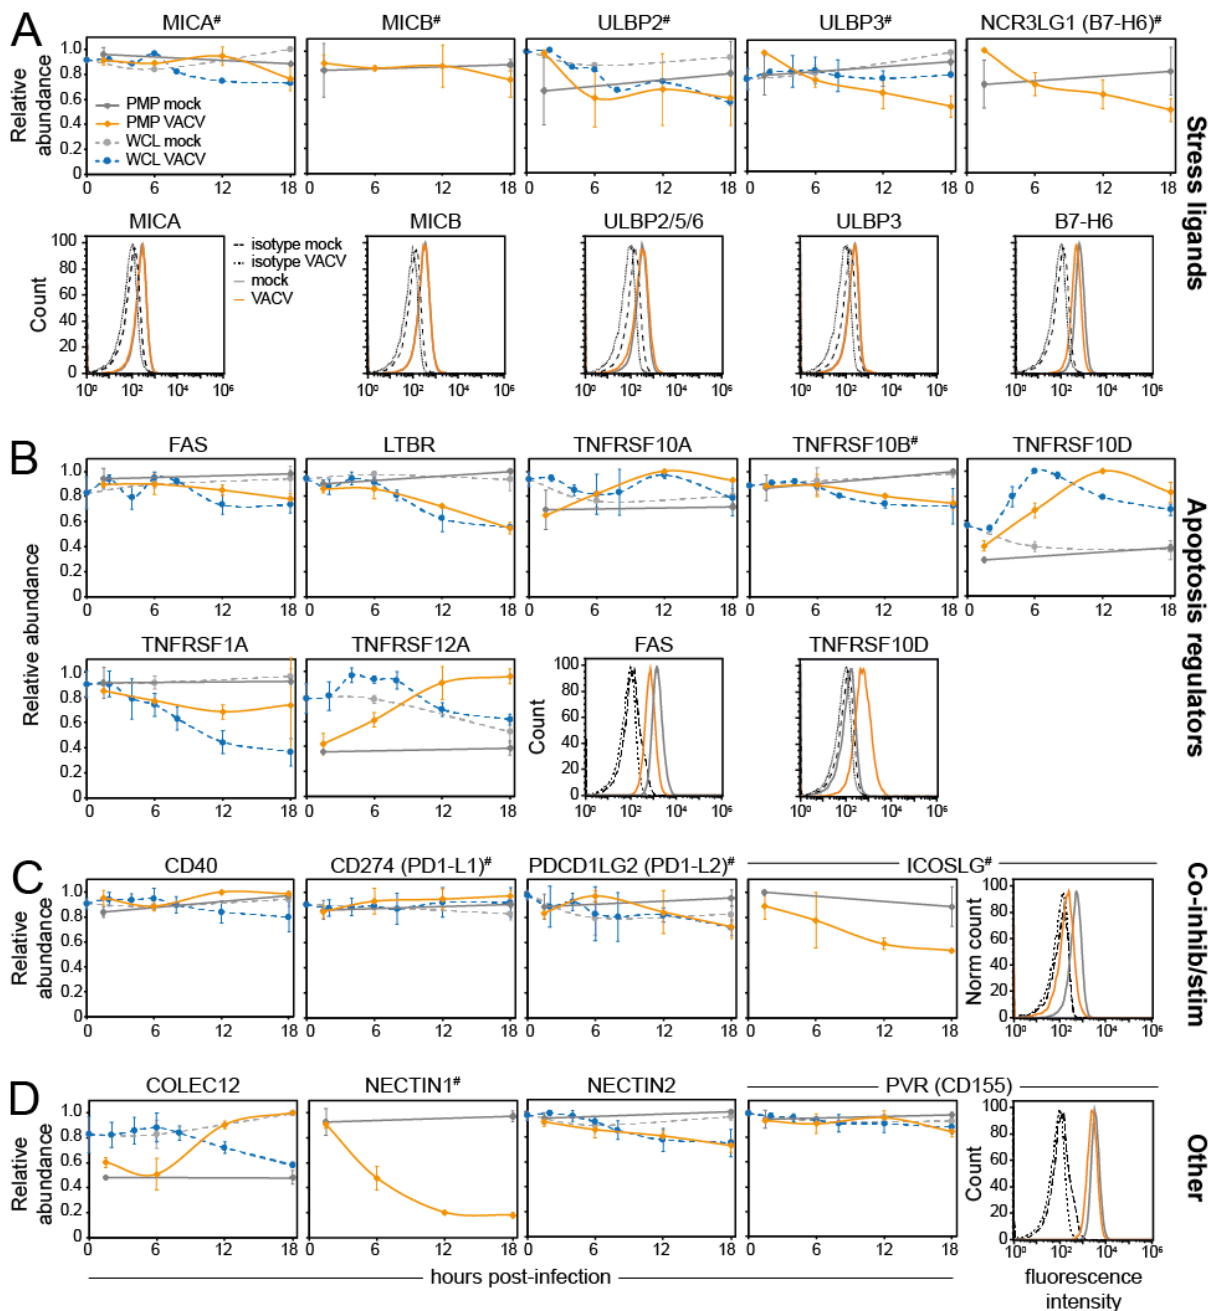

243 **Figure 4. Cell surface expression of immune cell ligands is selectively modulated during VACV infection.**  
 244 Temporal profiles showing the cell surface and whole-cell expression levels of (A) stress ligands for NKG2D  
 245 receptor, (B) apoptosis regulators, (C) co-inhibitory/stimulatory ligands and (D) other immune ligands. Data are  
 246 represented as mean  $\pm$  SD (PMP n=2; WCL (9) n=3, # WCL n<3). Cell surface downregulation of selected proteins  
 247 during VACV infection was confirmed by flow cytometry in HeLa cells (stress ligands & TNFRSF10D), HFFF-TERTs  
 248 (FAS) or DOHH2 cells (ICOSLG) at 15-18 hpi. Results are representative of at least two independent experiments.  
 249  
 250

251 It is probable that not all receptor-ligand pairs involved in lymphocyte regulation have been  
 252 identified. Most NK and T cell ligands display structural similarities and belong to a few protein  
 253 families including cadherins, collagen, C-type lectin, TNF, MHC and immunoglobulin (40) and

254 often these are modulated during viral infection. These characteristics were exploited to define  
 255 putative candidate surface proteins with immunomodulatory functions. Host PM proteins  
 256 substantially modulated during VACV infection were annotated with InterPro functional  
 257 domains (41). Six upregulated and 24 downregulated human PM proteins showed InterPro  
 258 domain annotations associated with NK/T cell ligands, which may influence immune  
 259 recognition (**Table S3**). This included multiple protocadherins, endosialin (CD248), and  
 260 several tyrosine-protein kinase receptors such as AXL, PTPRK, PTPRS and TYRO3 (**Figure**  
 261 **5**). Interestingly, protocadherins were also downregulated after infection with HCMV (30) and  
 262 knockdown of protocadherin FAT1 in target cells led to decreased NK cell degranulation (29).  
 263 Additionally, FGFR1 was reported to co-stimulate T cells (42), and targeting of AXL sensitised  
 264 lung cancer cells to lymphocyte-mediated cytotoxicity (43). Taken together, these proteins  
 265 modulated during VACV infection may represent putative immune ligands.

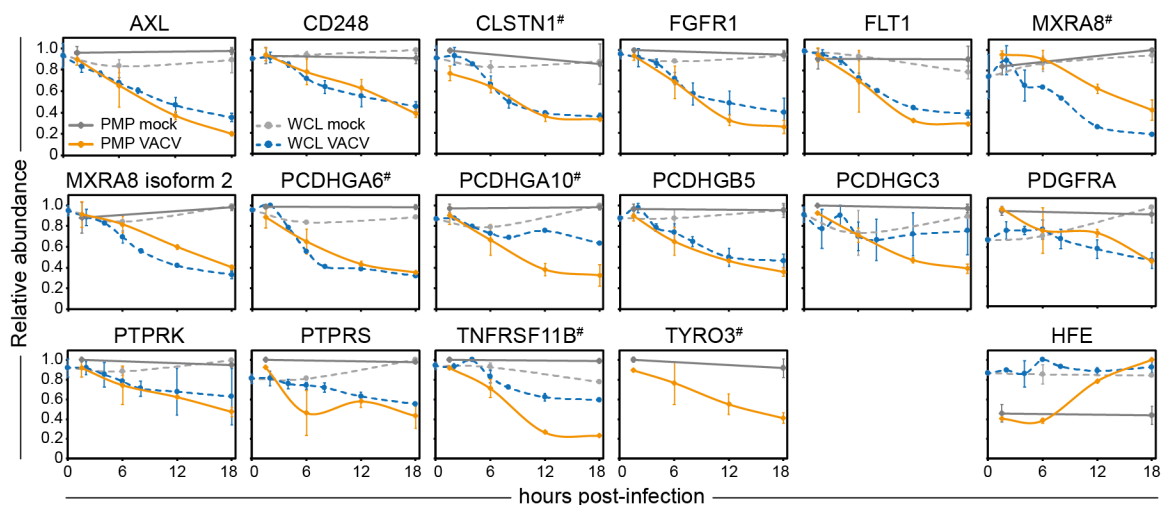

266  
 267 **Figure 5. Modulation of surface expression of putative immune ligands during VACV infection.** Temporal  
 268 profiles of selected putative immune ligands modulated during VACV infection (**Table S3**). Data are represented  
 269 as mean  $\pm$  SD (PMP n=2; WCL n=3 (9), #WCL < n=3).  
 270

### 271 VACV proteins detected at the plasma membrane

272 The VACV proteins detected at the PM increased in number and abundance as infection  
 273 progressed (**Figure 1C-D**). Given the poor annotation for the subcellular location of many  
 274 VACV proteins, a filtering strategy was applied to discriminate between VACV proteins that  
 275 are likely to be true PM proteins and non-PM contaminants that may have been detected due,  
 276 for example, to high intracellular abundance. The number of peptides identified for a given

277 protein was compared between PMP and WCL (9) proteomic datasets. For each human  
278 protein quantified in both PMP replicates, a peptide count ratio was calculated (29): (peptide  
279 counts PMP 1+2) / (peptide counts whole cell lysate 1+2+3). More than 90% of the human  
280 proteins that were GO-annotated as non-PM showed a peptide ratio <0.5, whereas 85% of  
281 the proteins scoring above 0.5 were defined as human PM proteins (**Figure 6A**). This  
282 illustrates that the peptide ratio is a reliable metric to predict if a protein is likely to be expressed  
283 at the cell surface, or if it is a non-PM contaminant.

284

285 The peptide ratio of 0.5 was applied to the 73 viral proteins quantified in either PMP replicate,  
286 and this identified 20 VACV proteins as high-confidence PM proteins (**Figure 6B, Table 1**).  
287 Twelve of these are known to be present at the host cell surface (A33, A34, A36, A38, A40,  
288 A43, A56 [HA], B5, B18, C3 [VCP], C11 [VGF-1] and K2) and six are secreted proteins (A41,  
289 B8, B18, B15 [IL-1 $\beta$ -BP], C3 and C11) (44), illustrating the validity of the filtering strategy. Note  
290 that some of the secreted proteins are also retained at the cell surface. Five other VACV  
291 proteins were identified with high-confidence as PM proteins, including the structural proteins  
292 A13 and L1 that form part of intracellular mature virus (IMV) surface (45, 46) and F13 that is  
293 present on the internal face of the outer membrane of the extracellular enveloped virus (EEV)  
294 (47, 48). The non-structural proteins C8 and F5 have not been described to interact with other  
295 VACV proteins and were identified as putative novel VACV PM proteins. F5 was reported to  
296 be located near the cell periphery, although has not been demonstrated previously to be  
297 exposed extracellularly (49).

298

299 VACV protein expression has been categorised into four temporal classes (9, 50-54). The  
300 high-confidence VACV PM proteins cover the four temporal classes, although the majority are  
301 expressed late during infection (temporal profile (Tp) 4, **Table 1**). Overall, the expression  
302 kinetics of the VACV proteins showed a slight delay in PM expression compared to the whole  
303 cell, which may reflect the time required for protein transport to the cell surface (**Figure 6C**).  
304 Interestingly, the temporal profiles of some secreted VACV proteins showed a reduction in

305 abundance at late time-points, consistent with protein secretion (**Figure 6C**). Notably, the  
 306 appearance of proteins C3 (VCP), and K2 (SPI-3) at the PM closely matched the kinetics of  
 307 cell surface A56 (HA) to which C3 and K2 bind (20).

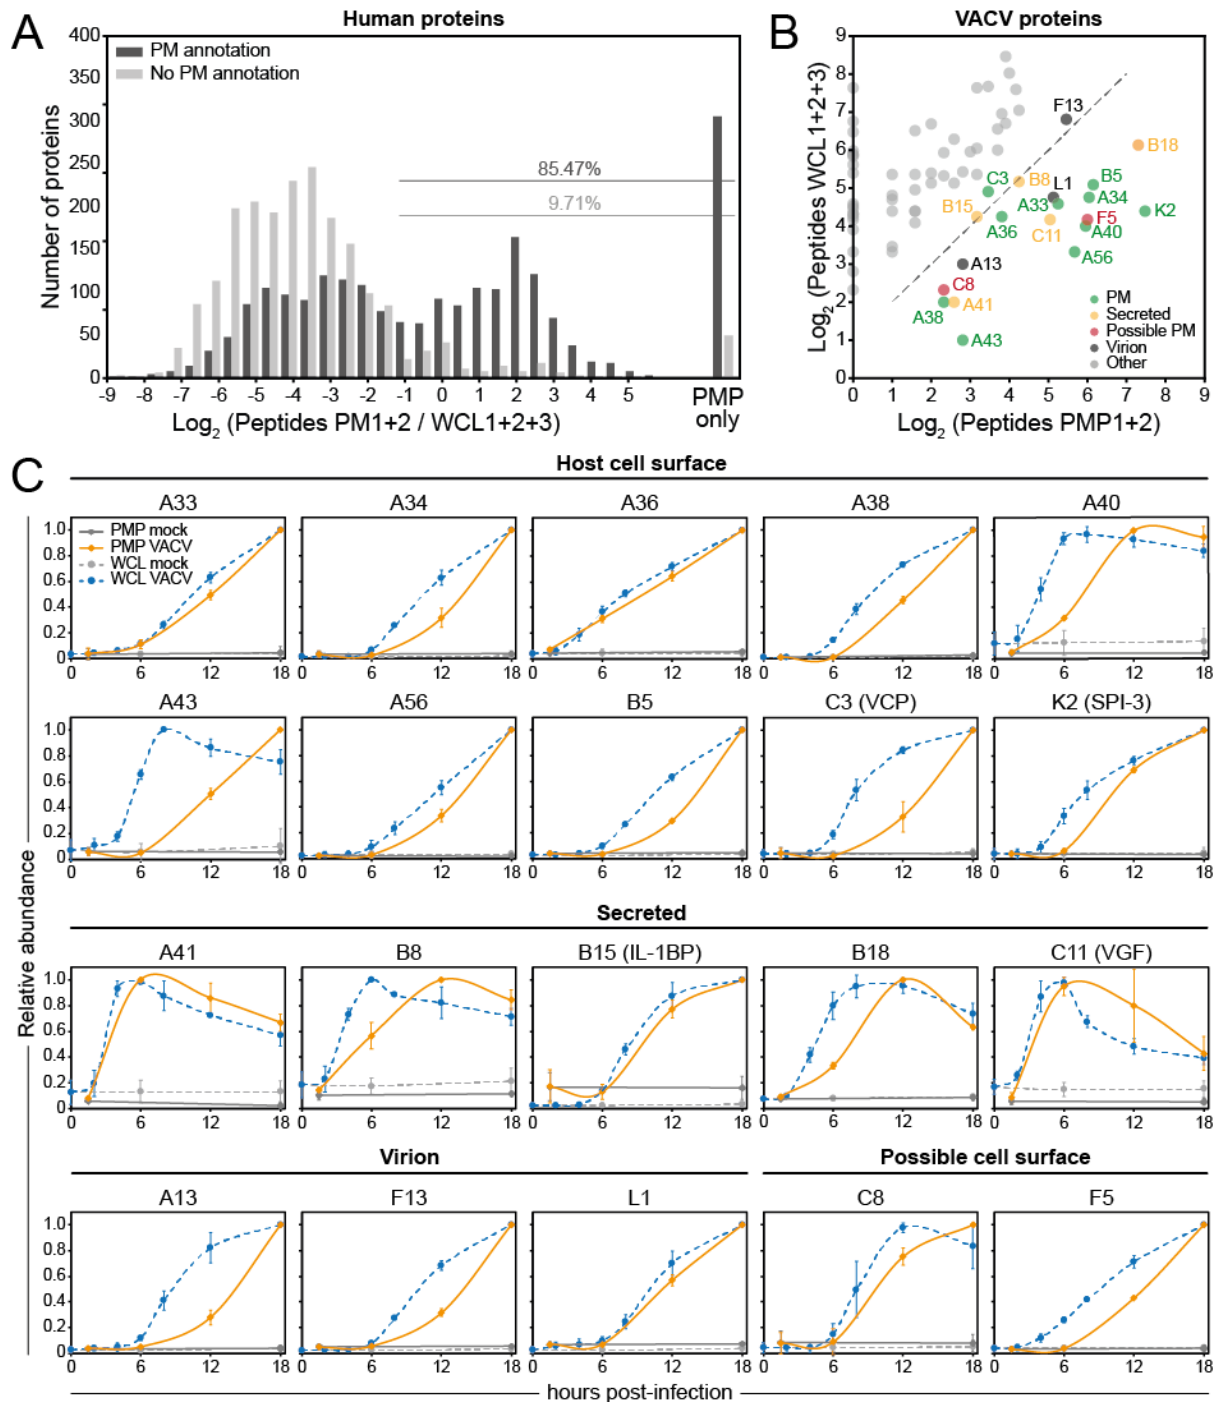

308  
 309  
 310 **Figure 6. Identification of high-confidence VACV PM proteins.** (A) Peptide ratios comparing the peptide count  
 311 for a given protein in the PMP vs. WCL (9) for all human proteins quantified in both PMP replicates. 'PMP only' =  
 312 not detected in any of the WCL replicates. 'PM annotation' includes GO terms PM, CS, XC and ShG. (B) Cut-off  
 313 peptide ratio of 0.5 (dashed line), as determined in panel A, applied to 73 VACV proteins detected in either of the  
 314 PMP replicates to identify high-confidence VACV PM proteins (**Table 1**). (C) Temporal profiles of all known and  
 315 high-confidence VACV PM and secreted proteins. Data are represented as mean  $\pm$  SD (PMP n=2; WCL n=3, A43:  
 316 WCL n=1).

317 **Table 1. Details of high-confidence VACV PM proteins** (related to Figure 6). Gene names from VACV strain  
 318 Copenhagen (Cop) have L or R to indicate direction of transcription. IEV = intracellular enveloped virus. IMV =  
 319 intracellular mature virus. EEV = extracellular enveloped virus. gp = glycoprotein. \*Gene non-functional in VACV  
 320 strain Copenhagen. \*\*For a review of VACV protein function and location see (44). \*\*\*Temporal classes 1 and 2  
 321 occur before viral DNA replication.

| Uniprot | Gene name VACV-Cop | Gene name VACV-WR | Protein description / function**                 | Known location**        | Temporal class *** (9) | Functional category (9, 51)   |
|---------|--------------------|-------------------|--------------------------------------------------|-------------------------|------------------------|-------------------------------|
| P01136  | C11L               | VACWR009          | C11, vaccinia growth factor, VGF                 | Secreted                | 1                      | Host interaction              |
| P24770  | B8R                | VACWR190          | B8, IFN $\gamma$ -binding protein, gp            | Secreted                | 1                      | Host interaction              |
| P24766  | A41L               | VACWR166          | A41, chemokine-binding protein, gp               | secreted                | 1                      | Host interaction              |
| P25213  | B19R               | VACWR200 / B18R   | B18, IFN $\alpha$ / $\beta$ -binding protein, gp | secreted & cell surface | 2                      | Host interaction              |
| P24765  | A40R               | VACWR165          | A40, type II membrane, gp                        | PM                      | 2                      | Host interaction              |
| P26671  | A43R               | VACWR168          | A43, gp                                          | PM                      | 2                      | Host interaction              |
| P18384  | K2L                | VACWR033          | K2, serine protease inhibitor 3 (SPI-3)          | secreted & PM           | 3                      | Host interaction              |
| P68619  | A36R               | VACWR159          | A36, protein egress and actin polymerisation     | PM                      | 3                      | Virion association (IEV only) |
| P68638  | C3L                | VACWR025          | C3, vaccinia complement control protein (VCP)    | secreted & cell surface | 3                      | Host interaction              |
| P17364  | C8L                | VACWR020          | C8                                               | Unknown                 | 3                      | Unknown                       |
| P24761  | A34R               | VACWR157          | A34, EEV envelope, gp                            | PM                      | 4                      | Virion association (EEV)      |
| Q01227  | B5R                | VACWR187          | B5, EEV envelope, gp                             | PM                      | 4                      | Virion association (EEV)      |
| P24358  | F5L                | VACWR044          | F5, major membrane protein                       | Unknown                 | 4                      | Unknown                       |
| Q01218  | A56R               | VACWR181          | A56, haemagglutinin, EEV envelope, gp            | PM                      | 4                      | Virion association (EEV)      |
| P68617  | A33R               | VACWR156          | A33, EEV envelope, gp                            | PM                      | 4                      | Virion association (EEV)      |
| Q76ZQ4  | A13L               | VACWR132          | A13, IMV membrane protein                        | IMV                     | 4                      | Virion association (IMV)      |
| P24763  | A38L               | VACWR162          | A38, gp                                          | PM                      | 4                      | Host interaction              |
| P25212  | B16R *             | VACWR197 / B15R   | B15, IL-1 $\beta$ -binding protein               | secreted                | 4                      | Host interaction              |
| P07612  | L1R                | VACWR088          | L1, IMV membrane protein                         | IMV                     | 4                      | Virion association (IMV)      |
| P04021  | F13L               | VACWR052          | F13, EEV membrane-associated protein             | EEV                     | 4                      | Virion association (EEV)      |

322

### 323 Mechanisms underlying changes in human PM protein expression during VACV infection

324 The expression of PM proteins during viral infection can be modulated by several mechanisms  
 325 such as proteasomal/lysosomal degradation, arrest of synthesis or protein translocation.  
 326 MG132 inhibits proteasomal degradation but also affects lysosomal cathepsins (55). To  
 327 identify which PM proteins are modulated by active degradation, a VACV-infected and a mock  
 328 sample were treated with MG132. MG132 was added at 2 hpi to allow the uncoating of VACV  
 329 that relies on the proteasome (56-58). An MG132 rescue ratio (RR) was calculated by  
 330 comparing the abundance of a given protein during VACV infection  $\pm$ MG132 with the  
 331 abundance of the same protein during mock-treatment  $\pm$ MG132. Of the 73 proteins  
 332 downregulated >2-fold in both replicates at 18 hpi, six (8.2%) showed a RR >1.5 (**Figure 7A-**

333 **B, Table S4A**). EPHB3 and APP also showed a RR >1.5 in the WCL MG132 analysis (9)  
 334 (**Table S1**). NECTIN1, INFAR2 and EPHB2 were not detected in the WCL MG132 dataset.  
 335 Taken together, unlike the WCL proteins, cell surface protein downregulation is likely regulated  
 336 predominantly through mechanisms other than proteasomal degradation.

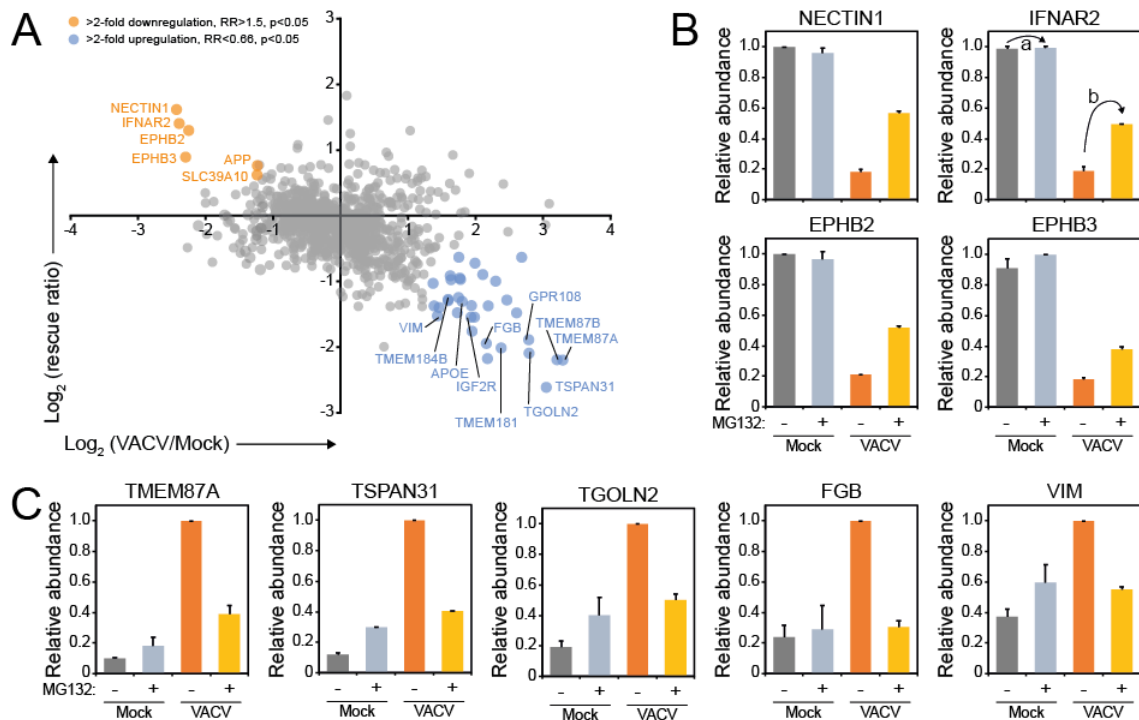

337

338 **Figure 7. Systematic analysis of proteasome-dependent changes in surface protein expression during**  
 339 **VACV infection.** (A) Identification of human PM proteins downregulated from the cell surface at 18 hpi (compared  
 340 to 18 h mock) in both replicates and rescued by addition of MG132 (>2 FC, rescue ratio (RR) >1.5, p<0.05), or  
 341 upregulated at the cell surface at 18 hpi (compared to 18 h mock) and diminished by the addition of MG132 (>2-  
 342 FC, RR<0.66, p<0.05) (**Table S4**). Here, we define the RR = b / a, where a = protein abundance during VACV  
 343 infection +MG132 / abundance during infection -MG132. This value was limited to 1 to avoid artificial ratio inflation.  
 344 b = protein abundance during mock-treatment +MG132 / abundance during mock -MG132 (see panel B, IFNAR2).  
 345 P-values were estimated using significance A with Benjamini-Hochberg correction for multiple hypothesis testing  
 346 (32). (B) Relative abundance of selected human proteins downregulated at the PM at 18 hpi and rescued by  
 347 addition of MG132. (C) Relative abundance of selected human PM proteins for which upregulation was prevented  
 348 by the addition of MG132 at 18hpi. Data are represented as mean  $\pm$  SD (n=2). **Table S1**.

349

350 Interestingly, addition of MG132 modulated cell surface expression of approximately a third of  
 351 the human PM proteins upregulated during VACV infection (**Figure 7A/C, Table S4B**). In this  
 352 and previous studies, it was observed that addition of MG132 inhibits expression of late VACV  
 353 genes, but not early genes (9, 57, 58). Therefore, proteasome-dependent upregulation of  
 354 proteins at the cell surface may indicate that a late VACV protein is responsible for the  
 355 observed increase in expression. Alternatively, these proteins may normally be retained inside  
 356 the cell by a second host protein which is degraded by the proteasome during VACV infection,



357 resulting in upregulation at the cell surface. VACV is known to shut-off host protein synthesis  
358 (59-63). Consequently, proteins with a short half-life may be downregulated from the PM  
359 during VACV infection due to natural turnover. In a previous study, protein turnover in HFFF-  
360 TERTs was quantified over 18 h by pulse (p)SILAC and 730 human PM proteins were  
361 identified (30). The abundance of 12 host proteins downregulated >2-fold from the cell surface  
362 during VACV infection was also shown to be reduced >2 fold in the pSILAC study (**Figure S3,**  
363 **Table S4C**). Taken together, these data suggest that proteasomal degradation and host  
364 protein synthesis shut-off are not the major mechanisms by which PM proteins are  
365 downregulated during VACV infection.

366

367 Host PM expression can be modulated during viral infection by degradation or enhanced  
368 production, but also by a translocation mechanism such as secretion, shedding, enhanced  
369 intracellular recycling or intracellular trapping. To identify human PM proteins that are  
370 up/downregulated during VACV infection via a translocation mechanism, protein expression  
371 levels in the PMP and WCL datasets were compared. The WCL dataset (9) was filtered for  
372 human proteins quantified in any of the replicates and showing on average >2 FC at any time-  
373 point (2, 4, 6, 8, 12, 18 hpi) compared to 18 h mock sample to determine which proteins are  
374 up-/downregulated during VACV infection.

375

376 Eighty-eight point five percent of the proteins downregulated >2-fold from the cell surface  
377 during VACV infection were also quantified in our prior WCL proteomic analysis, representing  
378 a total of 100 proteins. Within this group, about a third were downregulated in both studies  
379 (**Figure 8A, Table S5A-B**). DAVID functional enrichment analysis of these proteins showed  
380 significant enrichment of functional clusters, including 'Tyrosine-protein kinase', 'Protein  
381 autophosphorylation', 'Cadherin', 'Heparin-binding' and 'Postsynaptic membrane' (**Figure 8B,**  
382 **Table S5C**). This includes the ephrin protein family, IL6-ST and several, but not all,  
383 protocadherins (**Figures 2C & 8C**). An additional ~20 human PM proteins downregulated in  
384 the PMP dataset showed a downward trend in the WCL but did not meet the cut-off criteria

385 (e.g. EGFR or protocadherin gamma (PCDHG) A10, **Figure 2C**). The remainder of the  
 386 proteins were downregulated solely at the PM, indicating internalisation without active  
 387 degradation (e.g. IFNAR2 and KIT, **Figure 2C**).

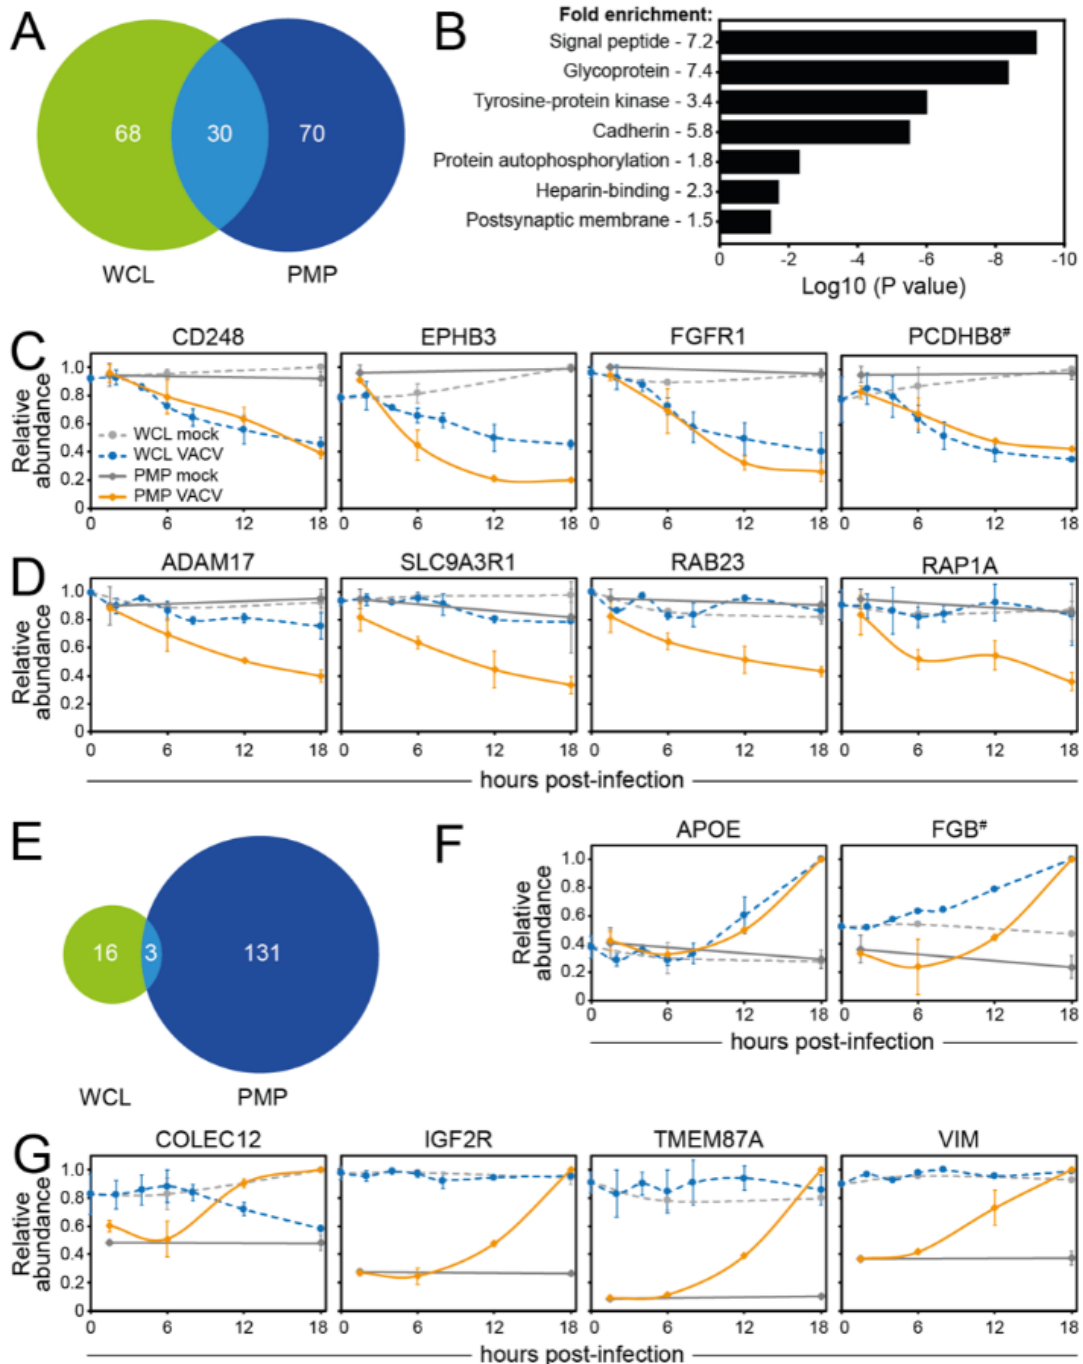

388

389 **Figure 8. Cell surface-specific regulation of protein expression during VACV infection.** (A) Overlap of  
 390 downregulated proteins between PMP and WCL according to 'sensitive' criteria (**Table S5A-B**). 'Sensitive' criteria  
 391 WCL (n=3) (9): human proteins quantified in any of the replicates and showing on average >2-fold-change at any  
 392 time-point (2, 4, 6, 8, 12, 18 hpi) compared to 18 h mock sample. (B) DAVID functional enrichment of the 30  
 393 proteins commonly downregulated from the cell surface and at whole-cell levels. A background of all proteins  
 394 detected in PMP and WCL proteomics was used. Representative terms from each cluster with a Benjamini-  
 395 Hochberg-corrected p-value of <0.05 are shown (**Table S5C**). (C) Temporal profiles of selected host proteins that  
 396 were commonly downregulated from the cell surface and at whole-cell level. (D) Temporal profiles of selected  
 397 human PM proteins that were only downregulated at the cell surface, but not at whole-cell level (E) Same as panel  
 398 A using proteins upregulated according to 'sensitive' criteria (**Table S5D**). (F) Temporal profiles of selected human

399 PM proteins that were commonly upregulated from the cell surface and at whole-cell level. (G) Temporal profiles  
400 of selected human PM proteins that are only upregulated at the cell surface, but not at whole-cell level. Data are  
401 represented as mean  $\pm$  SD (PMP n=2; WCL n=3 (9), # WCL n<3).  
402

403 Ninety-four point four percent of the human proteins >2-fold upregulated at the cell surface  
404 were also detected in the WCL proteomics, representing 134 proteins. Only three of these  
405 proteins were upregulated at both the cell surface and whole cell level during VACV infection:  
406 apolipoprotein E (APOE), TNFRSF10D and fibrinogen  $\beta$ -chain (FGB, **Figures 4B & 8E-G,**  
407 **Table S5D**). This is suggestive of enhanced protein synthesis, despite host shutoff. However,  
408 most upregulated proteins, including TGOLN2, HSPA5, CALR, ERAP1, SDC4, TNFRSF12A,  
409 COLEC12 and VIM, were only upregulated at the cell surface, indicating translocation to  
410 and/or stabilisation at the surface (**Figures 2E & 4B & 8F, Table S5E**).

#### 411 Identification of human PM proteins commonly targeted during virus infections

412

413 Host proteins that play an important role in antiviral immunity are often targeted by multiple  
414 viruses. To identify these proteins, the PMP dataset was compared to a published dataset  
415 analysing the cell surface proteome during infection with another dsDNA virus, HCMV (29,  
416 64). Given the different replicative niche of VACV and HCMV, common targets of these two  
417 viruses are of particular interest. Human PM proteins quantified in either or both replicates and  
418 showing on average >2 FC at any time-point (24, 48, 72 hpi compared to the average of mock  
419 samples) were considered as up-/downregulated during HCMV infection (**Table S6**). VACV  
420 infection led to a more selective modulation of protein expression compared to HCMV, but a  
421 considerable overlap between PM proteins up- or downregulated during VACV or HCMV  
422 infection was observed (**Figure 9A/D, Table S6A/C**).

423

424 Fifty-four percent of the proteins downregulated at the cell surface during VACV infection were  
425 quantified in the HCMV PMP dataset. DAVID analysis of the commonly downregulated  
426 proteins revealed that both viruses target RTKs - EPHB3, EPHA4, EPHA2, EPHB4, ERBB2,  
427 PDGFRA, FLT1, ERBB4, EPHB2 -, molecules with EGF-like domains - THBS2, NID2, FBLN5,  
428 CD248, FBLN1, THBS1, VASN -, and cadherins - PCDHGB5, PCDHGA10, PCDHGC5,

429 PCDHGC3 (**Figure 9B, Table S6B**). Other noteworthy proteins downregulated by both viruses  
 430 include IL-6ST and ICOSLG, indicating that these proteins may be important in the antiviral  
 431 response (**Figure 9C**).

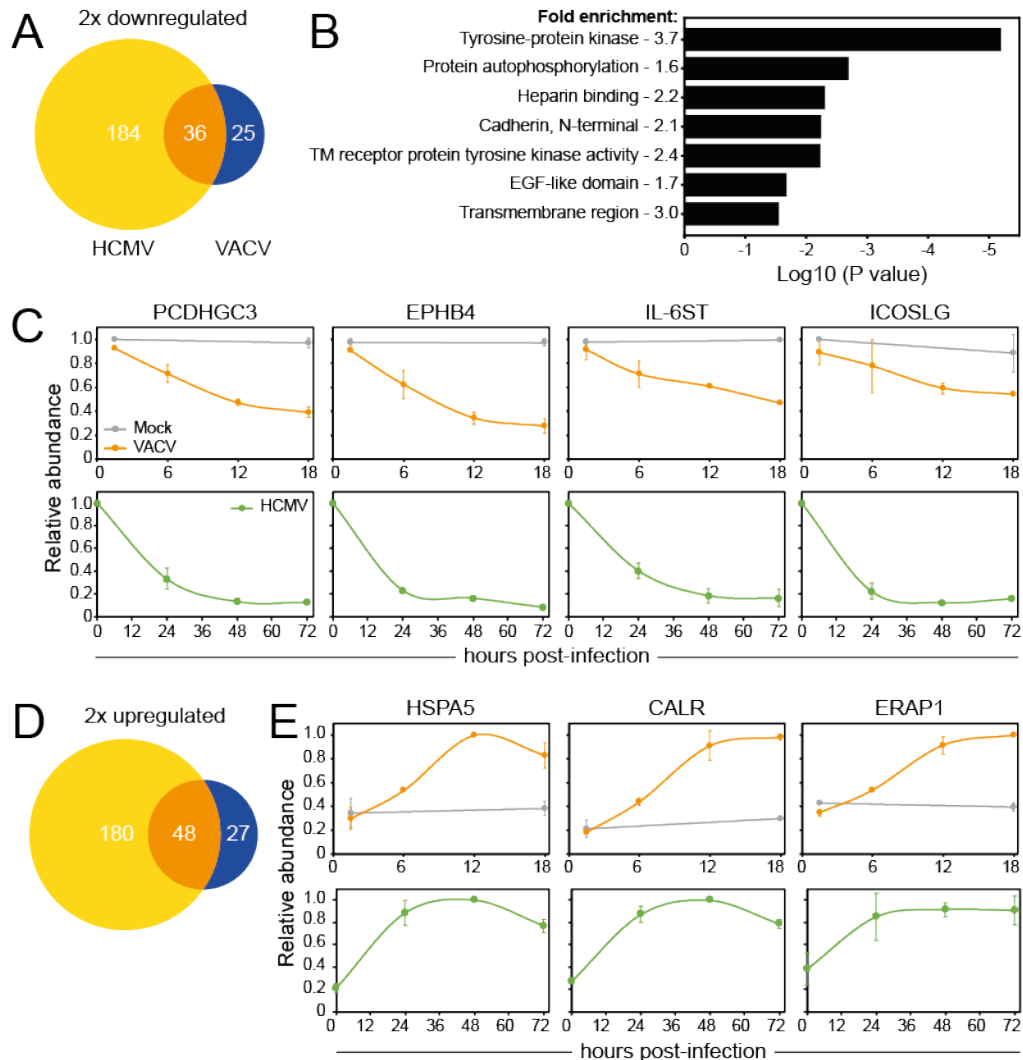

432

433 **Figure 9. HCMV and VACV commonly target a subset of PM proteins.** (A) Overlap of proteins downregulated  
 434 according to 'sensitive' criteria after infection with VACV or HCMV (**Table S6A**). 'Sensitive' criteria HCMV PMP  
 435 (n=2) (29): human PM- (GO terms PM/CS/XC/ShG) proteins quantified in a single or both replicates and showing  
 436 on average >2 FC at any time-point (24, 48, 72 hpi) compared to (average of) mock sample(s). (B) Functional  
 437 enrichment within proteins commonly downregulated from cell surface during VACV or HCMV infection ('sensitive'  
 438 criteria). A background of all proteins detected in at least one replicate of both PMP VACV and PMP HCMV was  
 439 used. Shown are representative terms from each cluster with a Benjamini-Hochberg-corrected p-value of <0.05  
 440 (**Table S6B**). (C) Temporal profiles of selected proteins commonly downregulated from the cell surface after VACV  
 441 or HCMV infection. (D-E) Same as panel A/C, respectively, using proteins upregulated according to 'sensitive'  
 442 criteria (**Table S6C**).

443

444 Fifty-two point eight percent of the proteins upregulated at the PM during VACV infection were  
 445 quantified in the HCMV PMP dataset. DAVID functional enrichment of proteins upregulated at  
 446 the cell surface by both VACV and HCMV infection revealed enrichment of functional clusters

447 for 'Protein processing ER' and 'Prevents secretion ER'. These clusters likely relate to ER  
448 stress, which is commonly triggered during viral infections due to a substantial increase in  
449 protein production. Several of the PM proteins that were strongly upregulated during VACV  
450 infection were also upregulated at the cell surface during HCMV infection, including HSPA5,  
451 CALR and ERPA1 (**Figure 9E, Table S6C**).

452

## 453 **Discussion**

454 In this study, quantitative temporal plasma membrane proteomics was used to assess  
455 systematically the impact of VACV infection on host and viral PM protein expression. Altered  
456 PM protein expression may represent a normal response to viral infection, VACV-mediated  
457 suppression of immune responses and/or modulation of the environment to support virus  
458 production and spread.

459

460 VACV infection resulted in selective modulation of host PM protein expression. Notably,  
461 substantial downregulation of several members of the RTK and protocadherin families was  
462 observed and these protein families were also downregulated from the PM during HCMV  
463 infection (29). Several members of the RTK (FGFR1, PDGFRA, KIT, FLT1, AXL, TYRO3) and  
464 protocadherin (PCDHGA10, PCDHGA6, PCDHGB5, PCDHGB7, PCDHGC3) families contain  
465 InterPro functional domains often found in immune ligands (40, 65), suggesting that they may  
466 act as immune regulators. This hypothesis is supported by previous reports that PM  
467 expression of the protocadherin FAT1 leads to decreased degranulation of NK cells (29) and  
468 that the RTK ephrin B2 leads to T cell co-stimulation (66). Particularly notable was the  
469 downregulation of the RTK EGFR, which was also observed after HSV-1 and HCMV infection  
470 (29, 67, 68). EGFR downregulation from VACV-infected cells is of particular interest because  
471 VACV also expresses a viral epidermal growth factor (called vaccinia growth factor, VGF,  
472 protein C11) that contributes to virulence (69). VGF stimulates cells surrounding the infected  
473 cell to proliferate, causing hyperplasia and mitotic bodies characteristic of orthopoxvirus

474 pathology (21). More recently, VGF was also reported to enhance motility of infected cells to  
475 promote viral spread (22). The removal of EGFR from the surface of VACV-infected cells may  
476 represent a strategy to promote binding of VGF to EGFR on surrounding uninfected cells  
477 thereby stimulating the metabolic activity of these cells to enhance virus replication.  
478 Alternatively, the removal of EGFR from the infected cell surface may reflect internalisation of  
479 activated EGFR upon engagement with VGF, followed by degradation rather than recycling to  
480 the PM (70).

481

482 PM proteins upregulated during VACV infection included chaperone proteins whose  
483 translocation to the PM is associated with ER stress and activation of the immune system (71).  
484 Some of these proteins are manipulated by viruses to suppress immune responses. For  
485 example, CALR suppresses IFN- $\alpha$  production and antiviral activity in the context of hepatitis  
486 B virus infection (72), ERAP1 induces cleavage of cytokine receptors (73, 74), and syndecan-  
487 4 (SDC4) negatively regulates retinoic acid-inducible gene I (RIG-I)-mediated signalling during  
488 virus infection (75). Overall, the increased PM expression of these proteins during VACV  
489 infection may indicate previously unknown strategies by which VACV manipulates the host  
490 response to infection.

491

492 VACV is well-known to interfere with cytokine signalling by expressing soluble binding  
493 proteins, or decoy receptors, for IL-1 $\beta$ , TNF $\alpha$ , IL-18, IFN- $\gamma$  and IFN- $\alpha/\beta$  (11). In addition, IFN  
494 signalling is targeted at several levels in the pathway downstream of the receptor (76, 77).  
495 The observed downregulation of IFNAR2 (type I IFN receptor) and IL10-RB (a component of  
496 multiple cytokine receptors, including type III IFNs) from the PM, may represent novel VACV  
497 strategies for evasion of the IFN response.

498

499 NK and T cells are activated by changes on the surface of the infected cell. There are  
500 contested reports that VACV infection leads to the mild downregulation of total MHC-I surface  
501 levels (14, 24-27). However, the selective downregulation of HLA-C from the cell surface

502 observed here is consistent with a previous study relying on HLA transfection (27). HLA-A and  
503 -B represent the majority of cell surface MHC-I (78), which explains why reduction of HLA-C  
504 did not substantially affect the total MHC-I levels detected by flow cytometry. HLA subtypes  
505 have a differential impact on the immune response and whilst all HLA-C molecules are KIR  
506 ligands, HLA-A and -B mostly interact with T cell receptors. Importantly, KIRs and HLA  
507 polymorphisms are linked to infectious disease outcome (79) and if the selective modulation  
508 of HLA-C is conserved in other orthopoxviruses, such as variola virus, this might have  
509 contributed to pathogenesis of smallpox.

510

511 The activating NKG2D ligands and B7-H6 (NKp30 ligand), which are typically upregulated in  
512 response to viral infection or in cancer cells (26, 80), were not upregulated during VACV  
513 infection and this may represent a novel strategy by which VACV evades the NK cell response.  
514 In contrast, VIM, a ligand for the activating receptor NKp46, was upregulated at the PM during  
515 VACV infection, whilst the total cell level remained unchanged. VIM upregulation sensitises  
516 mycobacterium tuberculosis-infected cells to NKp46-mediated lysis (81), facilitates adenovirus  
517 type 2 transport (82) and interacts with VACV virions and facilitates their assembly (83). Taken  
518 together, this suggests that translocation of VIM to the cell surface during VACV infection may  
519 be caused by virion transport. The immune system may have evolved a strategy to detect this  
520 through NKp46-mediated recognition of VIM.

521

522 Further, several immune checkpoints were selectively modulated during VACV infection. PD-  
523 L1 was not affected during VACV infection, which is in contrast with HCMV-induced up-  
524 regulation of PD-L1 (29). Downregulation of the costimulatory molecule ICOSLG potentially  
525 represents a novel mechanism by which VACV modulates NK and T cells (84-87). Additionally,  
526 RGMB downregulation may interfere with T cell costimulatory function (88) or affect co-  
527 inhibitory pathways (89). The impact of modulation of these proteins on the immune response  
528 remains to be determined.

529

530 More VACV proteins were detected at the PM than had been described hitherto, and a filtering  
531 strategy was used to distinguish likely true viral PM proteins from those that might represent  
532 'overspill' from an abundant intracellular pool. This process identified 5 possible new PM  
533 proteins: IMV envelope proteins A13 and L1 (45, 46), the EEV outer membrane protein F13  
534 (47) and non-structural proteins C8 and F5. L1, A13 and F13 might either be expressed at the  
535 PM or alternatively, their detection there might result from interactions with other proteins. For  
536 example, the presence of F13 might reflect its interaction with B5 and A56 (90, 91). C8 and  
537 F5 are not present in IMV particles (92-94) and are not known to interact with other VACV  
538 proteins (95). F5 has a transmembrane domain and is expressed at the periphery of the  
539 infected cell, in regions in contact with neighbouring cells (49). The subcellular localisation of  
540 C8 is unknown, but it also contains a hydrophobic domain that might function as either a signal  
541 peptide or transmembrane domain. Overall, these findings justify further study of the roles of  
542 C8 and F5 during VACV infection, particularly since non-structural PM proteins may have  
543 additional roles in immune regulation.

544

545 Systematic comparison of the PMP dataset with various other datasets gave insight into  
546 mechanisms used to regulate cell surface protein expression during VACV infection. Only six  
547 downregulated PM proteins were rescued by addition of MG132 (8.2%), which contrasts with  
548 the WCL proteomics where 69% of the proteins was rescued by MG132 (9). Nevertheless,  
549 most of the proteins downregulated from the PM were also downregulated, or showed a  
550 downward trend, at the whole-cell level. A combination of VACV-induced host shut-off and  
551 high protein turnover may explain the downregulation of a few proteins. However, most  
552 downregulated human PM proteins are likely degraded through non-proteasomal  
553 mechanisms, for example, lysosomal degradation. The remainder of the proteins were  
554 downregulated specifically from the cell surface, and not at the whole-cell level, likely  
555 indicating internalisation and/or retention in intracellular compartments without active protein  
556 degradation.



557

558 Proteins from the same family were not always regulated by the same mechanism. For  
559 example, the downregulation of PM ephrin B2 and B3, but not other ephrins, was prevented  
560 by addition of MG132. Additionally, most protocadherins were downregulated in both PMP  
561 and WCL experiments, however, protocadherin- $\gamma$  A10 and C3 did not show a clear  
562 downregulation at whole-cell level. Furthermore, protocadherin- $\gamma$  B4 downregulation may be  
563 the result of a high protein turnover in combination with host shut-off by VACV. This may  
564 indicate that VACV has developed several mechanisms to modulate specific members of a  
565 protein family, which may have particularly important functions as novel immune ligands.

566

567 Strikingly, even though HCMV and VACV encode a similar number of genes, VACV modulates  
568 the abundance of fewer proteins compared to HCMV. Similar observations were made after  
569 comparing WCL datasets of VACV or HCMV infection (9). The greater alteration of host protein  
570 abundance by HCMV, may reflect the longer and more complex HCMV infectious cycle  
571 including the ability to enter and exit the nucleus and establish latency. Nonetheless, there is  
572 considerable overlap between proteins targeted by both viruses. Targeting of the whole  
573 protocadherin family by multiple viruses may indicate that these proteins represent previously  
574 unknown immune ligands.

575

576 The PMP technique detects changes in expression levels, rather than modifications to  
577 proteins. Therefore, immune evasion strategies involving masking, interference with receptor-  
578 ligand binding and/or molecular mimicry may not be identified using this approach.  
579 Furthermore, the use of HFFF-TERTs – allowing for direct comparison with previously  
580 published data with the same cell type (9, 29, 30, 64) – limited the detection of immune ligands  
581 that are more commonly found on professional antigen presenting cells. Nonetheless, a  
582 number of potentially novel immunomodulatory strategies by VACV were identified. Overall,  
583 the PMP dataset represents a valuable resource providing new research avenues informing

584 on antiviral immune responses and viral immune evasion strategies, vaccine vector design  
585 and oncolytic virus therapy.

586

## 587 **Materials & methods**

### 588 Cells lines

589 Primary HFFF immortalised with human telomerase (HFFF-TERTs) (96) were grown in  
590 Dulbecco's modified Eagle's medium (DMEM; Gibco, Thermo Fisher Scientific, Lutterworth,  
591 UK) supplemented with 10 % foetal bovine serum (v/v; Seralab, London, UK) and 1 %  
592 penicillin/streptomycin (p/s; Gibco, Thermo Fischer, UK). BSC-1 (African green monkey cell  
593 line, ATCC CCL-26) were grown in DMEM supplemented with 10 % filtrated bovine serum  
594 (FBS; Pan Biotech UK Limited, Dorset, UK) and 1 % P/S. HeLa cells (human cervical ATCC  
595 CCL-2) and RK13 (Rabbit kidney cells, ATCC CCL37) were grown in Minimum Essential  
596 Medium (MEM; Gibco, Thermo Fischer, Lutterworth, UK) supplemented as described above  
597 for BSC-1 cells. Non-Hodgkin's B cell line DOHH2 (kind gift from Dr Daniel Hodson) was grown  
598 in Roswell Park Memorial Institute (RPMI)-1640 medium (Gibco, Thermo Fischer, Lutterworth,  
599 UK) with 10 % FBS and 1 % p/s. All cell lines were maintained at 37°C in 5 % CO<sub>2</sub>. Cells were  
600 routinely checked as mycoplasma negative (MycoAlert, Lonza, UK).

601

### 602 Vaccinia virus

603 VACV strain Western Reserve (WR) stocks were produced by infection of RK13 cells. Virus  
604 particles were released from cells by three freeze-thaw cycles and two rounds of 20 strokes  
605 of a Dounce homogenizer. Cell-free viruses were resuspended in 10 mM Tris HCl pH 9.0 and  
606 purified by sedimentation through a 36% (w/v) sucrose cushion twice (Fisher Chemical,  
607 Thermo Fisher Scientific). Purified viruses were resuspended in PBS, titrated in BSC-1 cells  
608 by plaque assay and stored at -80 °C.

609 Virus infections and MG132 treatment

610 Immediately before infection, the culture medium on 15 cm<sup>2</sup> dishes with 4 - 6.5 × 10<sup>6</sup> HFFF-  
611 TERTs was replaced with infection medium (DMEM supplemented with 2% FBS and 1% p/s).  
612 Cells were mock-treated or infected at MOI 5 with VACV in 6 ml infection medium. After 90  
613 min adsorption at 37°C, 15 ml of infection medium was added, and samples were incubated  
614 at 37°C until harvesting. For samples treated with the proteasome inhibitor MG132, 0.5 µl/ml  
615 medium (v/v; Merck, Kenilworth, U.S.A.) of 20 mM MG132 was added per flask at 2 hpi.  
616 Infections were staggered to allow for simultaneous harvesting of the indicated time-points.

617

618 Plasma membrane profiling and TMT labelling

619 Plasma membrane protein labelling was performed as described (29). Briefly, cell surface  
620 sialic acid residues were oxidised and biotinylated using 1 mM sodium periodate (Thermo  
621 Scientific), 100 mM aminoxy-biotin (Biotium Inc., Fremont, U.S.A.) in dry DMSO and 10 mM  
622 aniline (Sigma-Aldrich, Merck, Dorset, U.K.) in PBS pH 6.7 (Sigma-Aldrich). After 30 min at 4  
623 °C, the reaction was stopped by addition of glycerol (Sigma-Aldrich) at a final concentration of  
624 1 mM. Cells were harvested into 1.6 % Triton X-100 (Fisher Scientific), 150 mM NaCl (Sigma-  
625 Aldrich), 5 mM iodoacetamide (Sigma-Aldrich) in 10 mM Tris-HCl pH 7.6 (Sigma-Aldrich)  
626 supplemented with protease inhibitor tablets (Roche, Merck). Biotinylated glycoproteins were  
627 enriched with high-affinity streptavidin agarose beads (Pierce) and washed extensively.  
628 Captured protein were denatured with SDS and urea, reduced with DTT, alkylated with  
629 iodoacetamide (IAA, Sigma) and digested on-bead with trypsin (Promega) in 200 mM HEPES  
630 (4-(2-hydroxyethyl)-1piperazineethanesulfonic acid) pH 8.5 for 3 h. The digested peptides  
631 were eluted, and each sample labelled with 56 µg of a unique TMT reagent (Thermo Fisher  
632 Scientific) in a final acetonitrile concentration of 30 % (v/v) for 1 h at room temperature.  
633 Samples were labelled as follows: TMT 126 (WT VACV 90 min), TMT 127N (WT VACV 6 h),  
634 TMT 127C (WT VACV 12 h), TMT 128N (WT VACV 18 h), TMT 128C (Mock 18 h), TMT 130N  
635 (WT VACV + MG132 18 h), TMT 130C (Mock + MG132 18 h), TMT11-131C (Mock 90 min).  
636 The reaction was quenched with hydroxylamine to a final concentration of 0.5 % (v/v). TMT

637 labelled samples were combined at equal ratio, vacuum-centrifuged and subjected to C18  
638 solid-phase extraction (Sep-Pak, Waters).

639

### 640 HpRP Fractionation and LC-MS3

641 An unfractionated single-shot sample was analysed to ensure similar peptide loading across  
642 each TMT channel. The remaining TMT-labelled tryptic peptide samples were subjected to  
643 HpRP fractionation, as described (30) except that the samples were prepared as a single-set  
644 of 6 fractions. The fractions were dried and resuspended in 10  $\mu$ l MS solvent (4 % MeCN/5 %  
645 formic acid) prior to LC-MS3. Data from the single-shot experiment was analysed with data  
646 from the corresponding fractions to increase the overall number of peptides quantified. Mass  
647 spectrometry data was acquired using an Orbitrap Lumos (Thermo Fisher Scientific, San Jose,  
648 CA). An Ultimate 3000 RSLC nano UHPLC equipped with a 300  $\mu$ m ID x 5 mm Acclaim  
649 PepMap  $\mu$ -Precolumn (Thermo Fisher Scientific) and a 75  $\mu$ m ID x 50 cm 2.1  $\mu$ m particle  
650 Acclaim PepMap RSLC analytical column was used. Loading solvent was 0.1% FA, analytical  
651 solvent A: 0.1% FA and B: 80% MeCN + 0.1% FA. All separations were carried out at 40°C.  
652 Samples were loaded at 5  $\mu$ l/min for 5 min in loading solvent before beginning the analytical  
653 gradient. The following gradient was used: 3-7% B over 3 min, 7-37% B over 173 min, followed  
654 by a 4-min wash at 95% B and equilibration at 3% B for 15 min. Each analysis used a  
655 MultiNotch MS3-based TMT method (97, 98). The following settings were used: MS1: 380-  
656 1500 Th, 120,000 Resolution,  $2 \times 10^5$  automatic gain control (AGC) target, 50 ms maximum  
657 injection time. MS2: Quadrupole isolation at an isolation width of m/z 0.7, CID fragmentation  
658 (normalised collision energy (NCE) 35) with ion trap scanning in turbo mode from m/z 120,  $1.5$   
659  $\times 10^4$  AGC target, 120 ms maximum injection time. MS3: In Synchronous Precursor Selection  
660 mode the top 10 MS2 ions were selected for HCD fragmentation (NCE 65) and scanned in the  
661 Orbitrap at 60,000 resolution with an AGC target of  $1 \times 10^5$  and a maximum accumulation time  
662 of 150 ms. Ions were not accumulated for all parallelisable time. The entire MS/MS/MS cycle  
663 had a target time of 3 s. Dynamic exclusion was set to +/- 10 ppm for 70 s. MS2 fragmentation  
664 was triggered on precursors  $5 \times 10^3$  counts and above.

665

666 Protein quantification and data processing

667 Mass spectra were processed as described in (9) using MassPike, a sequest-based software  
668 pipeline, through a collaborative arrangement with Professor Steven Gygi's laboratory  
669 (Harvard Medical School). A combined database was constructed from (i) the human UniProt  
670 database (26<sup>th</sup> January 2017), (ii) the VACV strain WR UniProt database (23<sup>rd</sup> February 2017),  
671 (iii) common contaminants such as porcine trypsin. The combined database was  
672 concatenated with a reverse database composed of all protein sequences in reversed order.  
673 Searches were performed using a 20 ppm precursor ion tolerance, product ion tolerance was  
674 set to 0.03 Th. TMT tags on lysine residues and peptide N termini (229.162932 Da) and  
675 carbamidomethylation of cysteine residues (57.02146 Da) were set as static modifications,  
676 while oxidation of methionine residues (15.99492 Da) was set as a variable modification. To  
677 control the fraction of erroneous protein identifications, a target-decoy strategy was employed  
678 (99, 100). Peptide spectral matches (PSMs) were filtered to an initial peptide-level false  
679 discovery rate (FDR) of 1% with subsequent filtering to attain a final protein-level FDR of 1%  
680 (101, 102). PSM filtering was performed using a linear discriminant analysis, as described  
681 (103). This distinguishes correct from incorrect peptide IDs in a manner analogous to the  
682 widely used Percolator algorithm (104), though employing a distinct machine learning  
683 algorithm. The following parameters were considered: XCorr, DCn, missed cleavages, peptide  
684 length, charge state, and precursor mass accuracy. Protein assembly was guided by principles  
685 of parsimony to produce the smallest set of proteins necessary to account for all observed  
686 peptides (103). Proteins were quantified by summing TMT reporter ion counts across all  
687 matching peptide-spectral matches using "MassPike," as described (97, 98). A minimum one  
688 unique or shared peptide per protein was used for quantitation.

689 Briefly, a 0.003 Th window around the theoretical m/z of each reporter ion (126, 127n, 127c,  
690 128n, 128c, 129n, 129c, 130n, 130c, 131n, 131c) was scanned for ions, and the maximum  
691 intensity nearest to the theoretical m/z was used. The primary determinant of quantitation  
692 quality is the number of TMT reporter ions detected in each MS3 spectrum, which is directly

693 proportional to the signal-to-noise (S:N) ratio observed for each ion (105). Conservatively,  
694 every individual peptide used for quantitation was required to contribute sufficient TMT  
695 reporter ions (minimum of 1375 per spectrum) so that each on its own could be expected to  
696 provide a representative picture of relative protein abundance (97). Additionally, an isolation  
697 specificity filter was employed to minimize peptide co-isolation (106). Peptide-spectral  
698 matches with poor quality MS3 spectra (more than 9 TMT channels missing and/or a combined  
699 S:N ratio of less than 275 across all TMT reporter ions) or no MS3 spectra at all were excluded  
700 from quantitation. Peptides meeting the stated criteria for reliable quantitation were then  
701 summed by parent protein, in effect weighting the contributions of individual peptides to the  
702 total protein signal based on their individual TMT reporter ion yields.

703

704 Protein quantitation values were exported for further analysis in MS Excel. For protein  
705 quantitation, reverse and contaminant proteins were removed, then each reporter ion channel  
706 was summed across all quantified proteins and normalised assuming equal protein loading  
707 across all channels. Fractional TMT signals (i.e., reporting the fraction of maximal signal  
708 observed for each protein in each TMT channel, rather than the absolute normalised signal  
709 intensity) was used for further analysis and to display in figures. This effectively corrected for  
710 differences in the numbers of peptides detected per protein. For all proteins quantified in the  
711 PMP screens, normalized S:N ratio values are presented in **Table S1** ('Data original'  
712 worksheet). Peptide sequences initially assigned to HLA-A, -B or -C were manually compared  
713 to reference sequences of classical HLA-I expressed by HFFF-TERTs (HLA-A11:01, -A24:02,  
714 -B35:02, -B40:02, -C02:02, and -C04:01) (107). Only the peptides matching uniquely to the  
715 reference sequence of a single subtype (-A, -B, -C) were included. The summed S:N values  
716 of these peptides was used for the relative abundance of HLA-A, HLA-B or HLA-C and are  
717 available in **Table S1** ('Data' worksheet).

718

719 Validation of infection and modulation of host protein expression levels by flow cytometry

720 In parallel with infections for PMP, 10 cm<sup>2</sup> dishes with ~1x10<sup>6</sup> cells were mock-treated or  
721 infected with VACV at MOI 5. At 15.5 hpi, cells were harvested using trypsin-EDTA (Gibco)  
722 and fixed and permeabilised using Fixation/Permeabilization Solution Kit according to the  
723 manufacturer's instructions (BD Biosciences, San Jose, U.S.A.). Cells were stained with a  
724 mouse anti-D8 monoclonal antibody AB1.1 (108) followed by PE-conjugated goat anti-mouse  
725 IgG (BioLegend, San Diego, U.S.A.). To assess human PM protein expression levels, HFFF-  
726 TERTs or HeLa cells were mock-treated or infected with VACV at MOI 5 in DMEM 2 % FCS,  
727 1 % P/S. Cells were harvested at 14-16 hpi cells using accutase solution as per the  
728 manufacturer's instructions (Sigma-Aldrich). ICOSLG surface expression could not be  
729 detected by flow cytometry on HFFF-TERTs, therefore, DOHH2 cells were infected at MOI 50  
730 with VACV in RPMI-1640 with p/s. At 1 hpi, RPMI-1640 supplemented with 2% FBS (v/v) and  
731 1% p/s was added to resuspend cells at 500,000 cells / 100 µl. All validation of PM protein  
732 expression was performed with 2-2.5x10<sup>5</sup> cells / well, stained with Zombie NIR Fixable Viability  
733 Kit (Biolegend) in combination with MHC-I (W6/32, kindly provided by Dr L. Boyle), MICA  
734 (2C10, Santa Cruz Biotechnology, Santa Cruz, CA, USA), EPHB4 (rea923, Miltenyi Biotech,  
735 Bergisch Gladbach, Germany), CD95 (DX2, Miltenyi Biotech), EGFR (528, Santa Cruz), HLA-  
736 B/C (4E, kindly provided by Dr L. Boyle), HLA-C/E (DT9, kindly provided by Dr L. Boyle),  
737 ULBP3 (166510, R&D systems), B7-H6 (875001, R&D systems, Minneapolis, U.S.A), ULBP-  
738 2/5/6 (65903, R&D systems), Plexin-B1 (rea728, Miltenyi Biotech), MICB (236511, R&D  
739 systems), trail-R4 (104918, R&D systems), APC-conjugated ICOSLG Monoclonal Antibody  
740 (MIH12), isotype mouse Igg2b (Santa Cruz), isotype mouse IgG2a (Santa Cruz) isotype  
741 mouse IgG1 (Santa Cruz), Mouse IgG1 kappa Isotype Control (P3.6.2.8.1) conjugated with  
742 APC (eBioscience – part of Thermo Fisher Scientific, San Diego, CA, USA). Samples stained  
743 with unconjugated primary antibodies were subsequently probed with PE-conjugated Goat  
744 anti-mouse IgG (BioLegend). Cells were fixed using Fixation/Permeabilization Solution Kit  
745 according to the manufacturer's instructions (BD Biosciences). All samples were analysed by  
746 flow cytometry using the Invitrogen Attune NxT and FlowJo software.

747

748 Data analysis and bioinformatics

749 Analyses were performed using original python code using NumPy (109), pandas (110),  
750 Matplotlib (111), SciPy.stats (112) and sklearn.metrics (113) packages. To describe human  
751 PM proteins in this study, host proteins were filtered for relevant gene ontology (GO)  
752 annotations indicative of PM location; PM, 'cell surface' [CS], 'extracellular' [XC] and 'short  
753 GO' [ShG, 4-part term containing 'integral to membrane', 'intrinsic to membrane', 'membrane  
754 part', 'cell part' or a 5-part term additionally containing 'membrane']. Two sets of criteria were  
755 defined to determine which human PM proteins showed modulated expression levels during  
756 VACV infection. First, 'sensitive' criteria included proteins quantified in either or both PMP  
757 replicates showing >2x FC at any time-point during infection. Second, 'stringent' criteria limited  
758 the false discovery rate further and included proteins detected in both PMP replicates showing  
759 >2x FC with a p-value <0.05 (Benjamini-Hochberg corrected one-way ANOVA). To include all  
760 biologically relevant proteins, 'sensitive' criteria were used for subsequent analyses. A  
761 hierarchical clustering analysis based on uncentered Pearson correlation was performed on  
762 the FC with Cluster 3.0 (Stanford University). To avoid skewing the data with outliers, the FC  
763 was limited to 50 in either direction. A heatmap was visualised using Java TreeView (**Figure**  
764 **1C**). Volcano plots in **Figure 1D** do not show VACV protein H7 because there was no  
765 quantitative value available in the mock sample. Scale of the x-axis of these plots was limited  
766 from -7 to 7, which excluded VACV proteins C6 and RPO7 from this graph (**Figure 1D & S1D**).  
767 These two proteins were considered contaminants based on their function and subcellular  
768 localisation. Pathway enrichment analyses were performed using DAVID version 6.8 (33, 34).  
769 Indicated proteins were searched against a background of all human proteins quantified using  
770 default settings. InterPro domain annotations (65) were added to proteins modulated  
771 according to 'sensitive' criteria (**Table S3**). Putative immune ligands were defined by domain  
772 annotations cadherin, collagen, MHC, C-type lectin, immunoglobulin, Ig, TNF or butyrophilin.

773

774 Statistical analysis



775 Figures 1D, 7A, S1D: p-values were estimated using significance A with Benjamini-Hochberg  
776 correction for multiple hypothesis testing (32). For proteins quantified in both replicates, a one-  
777 way ANOVA was used to estimate p-values for FC during the infection time-course. Per  
778 replicate, the average value of mock 1.5 & 18 hpi was used as a control. P-values were  
779 corrected for multiple hypothesis testing using the Benjamini-Hochberg method. A corrected  
780 p-value of <0.05 was considered statistically significant.

781

#### 782 Data availability

783 The mass spectrometry proteomics data will be deposited to the ProteomeXchange  
784 Consortium (<http://www.proteomexchange.org/>) via the PRIDE partner repository. Data for all  
785 quantified VACV and human proteins are available in **Table S1** in which the 'Plotter' worksheet  
786 allows for interactive generation of temporal profiles.

787

#### 788 **Acknowledgements**

789 We would like to thank the Flow Cytometry core facility of the School of Biological Sciences,  
790 University of Cambridge for their technical assistance. The authors thank Dr Louise Boyle for  
791 HLA antibodies and Dr Daniel Hodson for DOHH2 cells. The authors acknowledge Henrietta  
792 Lacks for the HeLa cells. This work was supported by grant 090315 from the Wellcome Trust  
793 to GLS, and MR/M019810/1 from URKI MRC, and a Wellcome Senior Clinical Research  
794 Fellowship (108070/Z/15/Z) to MPW.

795

#### 796 **Competing interests**

797 The authors declare no competing or financial interests.

798

#### 799 **References**

800 1. Fenner F, Henderson DA, Arita I, Jezek Z, Ladnyi ID. Smallpox and its eradication. World Health  
801 Organisation, Geneva. 1988.

- 802 2. Mackett M, Smith GL, Moss B. Vaccinia virus: a selectable eukaryotic cloning and expression  
803 vector. *Proc Natl Acad Sci U S A.* 1982;79(23):7415-9.
- 804 3. Panicali D, Paoletti E. Construction of poxviruses as cloning vectors: insertion of the thymidine  
805 kinase gene from herpes simplex virus into the DNA of infectious vaccinia virus. *Proc Natl Acad  
806 Sci U S A.* 1982;79(16):4927-31.
- 807 4. Moss B. Genetically engineered poxviruses for recombinant gene expression, vaccination, and  
808 safety. *Proc Natl Acad Sci U S A.* 1996;93(21):11341-8.
- 809 5. Altenburg AF, Kreijtz JH, de Vries RD, Song F, Fux R, Rimmelzwaan GF, et al. Modified vaccinia  
810 virus ankara (MVA) as production platform for vaccines against influenza and other viral  
811 respiratory diseases. *Viruses.* 2014;6(7):2735-61.
- 812 6. Prow NA, Jimenez Martinez R, Hayball JD, Howley PM, Suhrbier A. Poxvirus-based vector systems  
813 and the potential for multi-valent and multi-pathogen vaccines. *Expert Rev Vaccines.*  
814 2018;17(10):925-34.
- 815 7. Lundstrom K. New frontiers in oncolytic viruses: optimizing and selecting for virus strains with  
816 improved efficacy. *Biologics.* 2018;12:43-60.
- 817 8. Torres-Dominguez LE, McFadden G. Poxvirus oncolytic virotherapy. *Expert Opin Biol Ther.*  
818 2019;19(6):561-73.
- 819 9. Soday L, Lu Y, Albarnaz JD, Davies CTR, Antrobus R, Smith GL, et al. Quantitative temporal  
820 proteomic analysis of vaccinia virus infection reveals regulation of histone deacetylases  
821 by an interferon antagonist. *Cell Rep.* 2019;27(6):1920-33 e7.
- 822 10. Lu Y, Stuart JH, Talbot-Cooper C, Agrawal-Singh S, Huntly B, Smid AI, et al. Histone deacetylase 4  
823 promotes type I interferon signaling, restricts DNA viruses, and is degraded via vaccinia virus  
824 protein C6. *Proc Natl Acad Sci U S A.* 2019;116(24):11997-2006.
- 825 11. Smith GL, Benfield CTO, Maluquer de Motes C, Mazzon M, Ember SWJ, Ferguson BJ, et al. Vaccinia  
826 virus immune evasion: mechanisms, virulence and immunogenicity. *J Gen Virol.* 2013;94(Pt  
827 11):2367-92.
- 828 12. Veyer DL, Carrara G, Maluquer de Motes C, Smith GL. Vaccinia virus evasion of regulated cell  
829 death. *Immunol Lett.* 2017;186:68-80.
- 830 13. Albarnaz JD, Torres AA, Smith GL. Modulating vaccinia virus immunomodulators to improve  
831 immunological memory. *Viruses.* 2018;10(3).
- 832 14. Jarahian M, Fiedler M, Cohnen A, Djandji D, Hammerling GJ, Gati C, et al. Modulation of NKp30-  
833 and NKp46-mediated natural killer cell responses by poxviral hemagglutinin. *PLoS Pathog.*  
834 2011;7(8):e1002195.
- 835 15. Wilcock D, Duncan SA, Traktman P, Zhang WH, Smith GL. The vaccinia virus A4OR gene product  
836 is a nonstructural, type II membrane glycoprotein that is expressed at the cell surface. *J Gen Virol.*  
837 1999;80:2137-48.
- 838 16. Alcami A, Symons JA, Smith GL. The vaccinia virus soluble alpha/beta interferon (IFN) receptor  
839 binds to the cell surface and protects cells from the antiviral effects of IFN. *J Virol.*  
840 2000;74(23):11230-9.
- 841 17. Montanuy I, Alejo A, Alcami A. Glycosaminoglycans mediate retention of the poxvirus type I  
842 interferon binding protein at the cell surface to locally block interferon antiviral responses. *FASEB  
843 J.* 2011;25(6):1960-71.
- 844 18. Kleinpeter P, Remy-Ziller C, Winter E, Gantzer M, Nourtier V, Kempf J, et al. By binding CD80  
845 and CD86, the vaccinia virus M2 protein blocks their interactions with both CD28 and  
846 CTLA4 and potentiates CD80 binding to PD-L1. *J Virol.* 2019;93(11).
- 847 19. Wang X, Piersma SJ, Elliott JI, Errico JM, Gainey MD, Yang L, et al. Cowpox virus encodes a protein  
848 that binds B7.1 and B7.2 and subverts T cell costimulation. *Proc Natl Acad Sci U S A.*  
849 2019;116(42):21113-9.
- 850 20. DeHaven BC, Gupta K, Isaacs SN. The vaccinia virus A56 protein: a multifunctional transmembrane  
851 glycoprotein that anchors two secreted viral proteins. *J Gen Virol.* 2011;92(Pt 9):1971-80.

- 852 21. Buller RML, Chakrabarti S, Moss B, Frederickson T. Cell proliferative response to vaccinia virus is  
853 mediated by VGF. *Virology*. 1988;164:182-92.
- 854 22. Beerli C, Yakimovich A, Kilcher S, Reynoso GV, Flaschner G, Muller DJ, et al. Vaccinia virus hijacks  
855 EGFR signalling to enhance virus spread through rapid and directed infected cell motility. *Nat*  
856 *Microbiol*. 2019;4(2):216-25.
- 857 23. Smith GL, Vanderplasschen A, Law M. The formation and function of extracellular enveloped  
858 vaccinia virus. *J Gen Virol*. 2002;83(Pt 12):2915-31.
- 859 24. Baraz L, Khazanov E, Condiotti R, Kotler M, Nagler A. Natural killer (NK) cells prevent virus  
860 production in cell culture. *Bone Marrow Transplant*. 1999;24(2):179-89.
- 861 25. Brooks CR, Elliott T, Parham P, Khakoo SI. The inhibitory receptor NKG2A determines lysis of  
862 vaccinia virus-infected autologous targets by NK cells. *J Immunol*. 2006;176(2):1141-7.
- 863 26. Chisholm SE, Reyburn HT. Recognition of vaccinia virus-infected cells by human natural killer cells  
864 depends on natural cytotoxicity receptors. *J Virol*. 2006;80(5):2225-33.
- 865 27. Kirwan S, Merriam D, Barsby N, McKinnon A, Burshtyn DN. Vaccinia virus modulation of natural  
866 killer cell function by direct infection. *Virology*. 2006;347(1):75-87.
- 867 28. Weekes MP, Antrobus R, Talbot S, Hor S, Simecek N, Smith DL, et al. Proteomic plasma membrane  
868 profiling reveals an essential role for gp96 in the cell surface expression of LDLR family members,  
869 including the LDL receptor and LRP6. *J Proteome Res*. 2012;11(3):1475-84.
- 870 29. Weekes MP, Tomasec P, Huttlin EL, Fielding CA, Nusinow D, Stanton RJ, et al. Quantitative  
871 temporal viromics: an approach to investigate host-pathogen interaction. *Cell*. 2014;157(6):1460-  
872 72.
- 873 30. Nightingale K, Lin KM, Ravenhill BJ, Davies C, Nobre L, Fielding CA, et al. High-definition analysis  
874 of host protein stability during human cytomegalovirus infection reveals antiviral factors and viral  
875 evasion mechanisms. *Cell Host Microbe*. 2018;24(3):447-60 e11.
- 876 31. Hsu JL, van den Boomen DJ, Tomasec P, Weekes MP, Antrobus R, Stanton RJ, et al. Plasma  
877 membrane profiling defines an expanded class of cell surface proteins selectively targeted for  
878 degradation by HCMV US2 in cooperation with UL141. *PLoS Pathog*. 2015;11(4):e1004811.
- 879 32. Cox J, Mann M. MaxQuant enables high peptide identification rates, individualized p.p.b.-range  
880 mass accuracies and proteome-wide protein quantification. *Nat Biotechnol*. 2008;26(12):1367-  
881 72.
- 882 33. Huang da W, Sherman BT, Lempicki RA. Systematic and integrative analysis of large gene lists  
883 using DAVID bioinformatics resources. *Nat Protoc*. 2009;4(1):44-57.
- 884 34. Huang da W, Sherman BT, Lempicki RA. Bioinformatics enrichment tools: paths toward the  
885 comprehensive functional analysis of large gene lists. *Nucleic Acids Res*. 2009;37(1):1-13.
- 886 35. Linger RM, Keating AK, Earp HS, Graham DK. TAM receptor tyrosine kinases: biologic functions,  
887 signaling, and potential therapeutic targeting in human cancer. *Adv Cancer Res*. 2008;100:35-83.
- 888 36. Parham P, Norman PJ, Abi-Rached L, Guethlein LA. Human-specific evolution of killer cell  
889 immunoglobulin-like receptor recognition of major histocompatibility complex class I molecules.  
890 *Philos Trans R Soc Lond B Biol Sci*. 2012;367(1590):800-11.
- 891 37. Brandt CS, Baratin M, Yi EC, Kennedy J, Gao Z, Fox B, et al. The B7 family member B7-H6 is a tumor  
892 cell ligand for the activating natural killer cell receptor NKp30 in humans. *J Exp Med*.  
893 2009;206(7):1495-503.
- 894 38. Matta J, Baratin M, Chiche L, Forel JM, Cognet C, Thomas G, et al. Induction of B7-H6, a ligand for  
895 the natural killer cell-activating receptor NKp30, in inflammatory conditions. *Blood*.  
896 2013;122(3):394-404.
- 897 39. Raulet DH, Gasser S, Gowen BG, Deng W, Jung H. Regulation of ligands for the NKG2D activating  
898 receptor. *Annu Rev Immunol*. 2013;31:413-41.
- 899 40. Vivier E, Tomasello E, Baratin M, Walzer T, Ugolini S. Functions of natural killer cells. *Nat Immunol*.  
900 2008;9(5):503-10.
- 901 41. Blum M, Chang HY, Chuguransky S, Grego T, Kandasaamy S, Mitchell A, et al. The InterPro protein  
902 families and domains database: 20 years on. *Nucleic Acids Res*. 2021;49(D1):D344-D54.

- 903 42. Kos FJ, Chin CS. Costimulation of T cell receptor-triggered IL-2 production by Jurkat T cells via  
904 fibroblast growth factor receptor 1 upon its engagement by CD56. *Immunol Cell Biol.*  
905 2002;80(4):364-9.
- 906 43. Terry S, Abdou A, Engelsen AST, Buart S, Dessen P, Cognac S, et al. AXL targeting overcomes  
907 human lung cancer cell resistance to NK- and CTL-mediated cytotoxicity. *Cancer Immunol Res.*  
908 2019;7(11):1789-802.
- 909 44. Moss B, Smith GL. Poxviridae: the viruses and their replication. In: Howley PM, Knipe DM, editors.  
910 *Fields Virology: DNA viruses*. 2. 7th ed: Wolters Kluwer Inc; 2021. p. 573-613.
- 911 45. Jensen ON, Houthaeve T, Shevchenko A, Cudmore S, Ashford T, Mann M, et al. Identification of  
912 the major membrane and core proteins of vaccinia virus by two-dimensional electrophoresis. *J*  
913 *Virol.* 1996;70(11):7485-97.
- 914 46. Martin KH, Grosenbach DW, Franke CA, Hruby DE. Identification and analysis of three  
915 myristylated vaccinia virus late proteins. *J Virol.* 1997;71(7):5218-26.
- 916 47. Hirt P, Hiller G, Wittek R. Localization and fine structure of a vaccinia virus gene encoding an  
917 envelope antigen. *J Virol.* 1986;58(3):757-64.
- 918 48. Blasco R, Moss B. Extracellular vaccinia virus formation and cell-to-cell virus transmission are  
919 prevented by deletion of the gene encoding the 37,000 Dalton outer envelope protein. *J Virol.*  
920 1991;65:5910-20.
- 921 49. Dobson BM, Procter DJ, Hollett NA, Flesch IE, Newsome TP, Tschärke DC. Vaccinia virus F5 is  
922 required for normal plaque morphology in multiple cell lines but not replication in culture or  
923 virulence in mice. *Virology.* 2014;456-457:145-56.
- 924 50. Yang Z, Reynolds SE, Martens CA, Bruno DP, Porcella SF, Moss B. Expression profiling of the  
925 intermediate and late stages of poxvirus replication. *J Virol.* 2011;85(19):9899-908.
- 926 51. Yang Z, Bruno DP, Martens CA, Porcella SF, Moss B. Simultaneous high-resolution analysis of  
927 vaccinia virus and host cell transcriptomes by deep RNA sequencing. *Proc Natl Acad Sci U S A.*  
928 2010;107(25):11513-8.
- 929 52. Assarsson E, Greenbaum JA, Sundstrom M, Schaffer L, Hammond JA, Pasquetto V, et al. Kinetic  
930 analysis of a complete poxvirus transcriptome reveals an immediate-early class of genes. *Proc*  
931 *Natl Acad Sci U S A.* 2008;105(6):2140-5.
- 932 53. Croft NP, de Verteuil DA, Smith SA, Wong YC, Schittenhelm RB, Tschärke DC, et al. Simultaneous  
933 quantification of viral antigen expression kinetics using data-independent (DIA) mass  
934 spectrometry. *Mol Cell Proteomics.* 2015;14(5):1361-72.
- 935 54. Yang Z, Cao S, Martens CA, Porcella SF, Xie Z, Ma M, et al. Deciphering poxvirus gene expression  
936 by RNA sequencing and ribosome profiling. *J Virol.* 2015;89(13):6874-86.
- 937 55. Wiertz EJ, Jones TR, Sun L, Bogyo M, Geuze HJ, Ploegh HL. The human cytomegalovirus US11 gene  
938 product dislocates MHC class I heavy chains from the endoplasmic reticulum to the cytosol. *Cell.*  
939 1996;84(5):769-79.
- 940 56. Mercer J, Snijder B, Sacher R, Burkard C, Bleck CK, Stahlberg H, et al. RNAi screening reveals  
941 proteasome- and Cullin3-dependent stages in vaccinia virus infection. *Cell Rep.* 2012;2(4):1036-  
942 47.
- 943 57. Satheshkumar PS, Anton LC, Sanz P, Moss B. Inhibition of the ubiquitin-proteasome system  
944 prevents vaccinia virus DNA replication and expression of intermediate and late genes. *J Virol.*  
945 2009;83(6):2469-79.
- 946 58. Teale A, Campbell S, Van Buuren N, Magee WC, Watmough K, Couturier B, et al. Orthopoxviruses  
947 require a functional ubiquitin-proteasome system for productive replication. *J Virol.*  
948 2009;83(5):2099-108.
- 949 59. Moss B. Inhibition of HeLa cell protein synthesis by the vaccinia virion. *J Virol.* 1968;2(10):1028-  
950 37.
- 951 60. Parrish S, Moss B. Characterization of a vaccinia virus mutant with a deletion of the D10R gene  
952 encoding a putative negative regulator of gene expression. *J Virol.* 2006;80(2):553-61.

- 953 61. Parrish S, Moss B. Characterization of a second vaccinia virus mRNA-decapping enzyme conserved  
954 in poxviruses. *J Virol.* 2007;81(23):12973-8.
- 955 62. Rice AP, Roberts BE. Vaccinia virus induces cellular mRNA degradation. *J Virol.* 1983;47(3):529-  
956 39.
- 957 63. Strnadova P, Ren H, Valentine R, Mazzon M, Sweeney TR, Brierley I, et al. Inhibition of translation  
958 initiation by protein 169: a vaccinia virus strategy to suppress innate and adaptive immunity and  
959 alter virus virulence. *PLoS Pathog.* 2015;11(9):e1005151.
- 960 64. Weekes MP, Tan SY, Poole E, Talbot S, Antrobus R, Smith DL, et al. Latency-associated degradation  
961 of the MRP1 drug transporter during latent human cytomegalovirus infection. *Science.*  
962 2013;340(6129):199-202.
- 963 65. Hunter S, Jones P, Mitchell A, Apweiler R, Attwood TK, Bateman A, et al. InterPro in 2011: new  
964 developments in the family and domain prediction database. *Nucleic Acids Res.*  
965 2012;40(Database issue):D306-12.
- 966 66. Yu G, Luo H, Wu Y, Wu J. Ephrin B2 induces T cell costimulation. *J Immunol.* 2003;171(1):106-14.
- 967 67. Nakano K, Asano R, Tsumoto K, Kwon H, Goins WF, Kumagai I, et al. Herpes simplex virus targeting  
968 to the EGF receptor by a gD-specific soluble bridging molecule. *Mol Ther.* 2005;11(4):617-26.
- 969 68. Jafferji I, Bain M, King C, Sinclair JH. Inhibition of epidermal growth factor receptor (EGFR)  
970 expression by human cytomegalovirus correlates with an increase in the expression and binding  
971 of Wilms' Tumour 1 protein to the EGFR promoter. *J Gen Virol.* 2009;90(Pt 7):1569-74.
- 972 69. Buller RM, Chakrabarti S, Cooper JA, Twardzik DR, Moss B. Deletion of the vaccinia virus growth  
973 factor gene reduces virus virulence. *J Virol.* 1988;62(3):866-74.
- 974 70. Henriksen L, Grandal MV, Knudsen SL, van Deurs B, Grovdal LM. Internalization mechanisms of  
975 the epidermal growth factor receptor after activation with different ligands. *PLoS One.*  
976 2013;8(3):e58148.
- 977 71. Wiersma VR, Michalak M, Abdullah TM, Bremer E, Eggleton P. Mechanisms of Translocation of  
978 ER Chaperones to the Cell Surface and Immunomodulatory Roles in Cancer and Autoimmunity.  
979 *Front Oncol.* 2015;5:7.
- 980 72. Yue X, Wang H, Zhao F, Liu S, Wu J, Ren W, et al. Hepatitis B virus-induced calreticulin protein is  
981 involved in IFN resistance. *J Immunol.* 2012;189(1):279-86.
- 982 73. Cui X, Rouhani FN, Hawari F, Levine SJ. Shedding of the type II IL-1 decoy receptor requires a  
983 multifunctional aminopeptidase, aminopeptidase regulator of TNF receptor type 1 shedding. *J*  
984 *Immunol.* 2003;171(12):6814-9.
- 985 74. Cui X, Rouhani FN, Hawari F, Levine SJ. An aminopeptidase, ARTS-1, is required for interleukin-6  
986 receptor shedding. *J Biol Chem.* 2003;278(31):28677-85.
- 987 75. Lin W, Zhang J, Lin H, Li Z, Sun X, Xin D, et al. Syndecan-4 negatively regulates antiviral signalling  
988 by mediating RIG-I deubiquitination via CYLD. *Nat Commun.* 2016;7:11848.
- 989 76. Smith GL, Talbot-Cooper C, Lu Y. How does vaccinia virus interfere with interferon? *Adv Virus Res.*  
990 2018;100:355-78.
- 991 77. Talbot-Cooper C, Pantelejevs T, Shannon JP, Cherry CR, Au MT, Hyvönen M, et al. A strategy to  
992 suppress STAT1 signalling conserved in pathogenic poxviruses and paramyxoviruses. *BioRxiv.* 2021.
- 993 78. Snary D, Barnstable CJ, Bodmer WF, Crumpton MJ. Molecular structure of human  
994 histocompatibility antigens: the HLA-C series. *Eur J Immunol.* 1977;7(8):580-5.
- 995 79. Parham P, Guethlein LA. Genetics of natural killer cells in human health, disease, and survival.  
996 *Annu Rev Immunol.* 2018;36:519-48.
- 997 80. Estes G, Guerra S, Vales-Gomez M, Reyburn HT. Innate immune recognition of double-stranded  
998 RNA triggers increased expression of NKG2D ligands after virus infection. *J Biol Chem.*  
999 2017;292(50):20472-80.
- 1000 81. Garg A, Barnes PF, Porgador A, Roy S, Wu S, Nanda JS, et al. Vimentin expressed on  
1001 *Mycobacterium tuberculosis*-infected human monocytes is involved in binding to the NKp46  
1002 receptor. *J Immunol.* 2006;177(9):6192-8.

- 1003 82. Belin MT, Boulanger P. Processing of vimentin occurs during the early stages of adenovirus  
1004 infection. *J Virol.* 1987;61(8):2559-66.
- 1005 83. Risco C, Rodriguez JR, Lopez-Iglesias C, Carrascosa JL, Esteban M, Rodriguez D. Endoplasmic  
1006 reticulum-Golgi intermediate compartment membranes and vimentin filaments participate in  
1007 vaccinia virus assembly. *J Virol.* 2002;76(4):1839-55.
- 1008 84. Aicher A, Hayden-Ledbetter M, Brady WA, Pezzutto A, Richter G, Magaletti D, et al.  
1009 Characterization of human inducible costimulator ligand expression and function. *J Immunol.*  
1010 2000;164(9):4689-96.
- 1011 85. Ogasawara K, Yoshinaga SK, Lanier LL. Inducible costimulator costimulates cytotoxic activity and  
1012 IFN-gamma production in activated murine NK cells. *J Immunol.* 2002;169(7):3676-85.
- 1013 86. Shiao SL, McNiff JM, Pober JS. Memory T cells and their costimulators in human allograft injury. *J*  
1014 *Immunol.* 2005;175(8):4886-96.
- 1015 87. Wallin JJ, Liang L, Bakardjiev A, Sha WC. Enhancement of CD8+ T cell responses by ICOS/B7h  
1016 costimulation. *J Immunol.* 2001;167(1):132-9.
- 1017 88. Sekiya T, Takaki S. RGMB enhances the suppressive activity of the monomeric secreted form of  
1018 CTLA-4. *Sci Rep.* 2019;9(1):6984.
- 1019 89. Xiao Y, Yu S, Zhu B, Bedoret D, Bu X, Francisco LM, et al. RGMB is a novel binding partner for PD-  
1020 L2 and its engagement with PD-L2 promotes respiratory tolerance. *J Exp Med.* 2014;211(5):943-  
1021 59.
- 1022 90. Lorenzo MM, Sanchez-Puig JM, Blasco R. Mutagenesis of the palmitoylation site in vaccinia virus  
1023 envelope glycoprotein B5. *J Gen Virol.* 2012;93(Pt 4):733-43.
- 1024 91. Oie M, Shida H, Ichihashi Y. The function of the vaccinia hemagglutinin in the proteolytic  
1025 activation of infectivity. *Virology.* 1990;176(2):494-504.
- 1026 92. Chung CS, Chen CH, Ho MY, Huang CY, Liao CL, Chang W. Vaccinia virus proteome: identification  
1027 of proteins in vaccinia virus intracellular mature virion particles. *J Virol.* 2006;80(5):2127-40.
- 1028 93. Yoder JD, Chen TS, Gagnier CR, Vemulapalli S, Maier CS, Hruby DE. Pox proteomics: mass  
1029 spectrometry analysis and identification of Vaccinia virion proteins. *Virology.* 2006;3:10.
- 1030 94. Resch W, Hixson KK, Moore RJ, Lipton MS, Moss B. Protein composition of the vaccinia virus  
1031 mature virion. *Virology.* 2007;358(1):233-47.
- 1032 95. McCraith S, Holtzman T, Moss B, Fields S. Genome-wide analysis of vaccinia virus protein-protein  
1033 interactions. *Proc Natl Acad Sci U S A.* 2000;97(9):4879-84.
- 1034 96. McSharry BP, Jones CJ, Skinner JW, Kipling D, Wilkinson GWG. Human telomerase reverse  
1035 transcriptase-immortalized MRC-5 and HCA2 human fibroblasts are fully permissive for human  
1036 cytomegalovirus. *J Gen Virol.* 2001;82(Pt 4):855-63.
- 1037 97. McAlister GC, Huttlin EL, Haas W, Ting L, Jedrychowski MP, Rogers JC, et al. Increasing the  
1038 multiplexing capacity of TMTs using reporter ion isotopologues with isobaric masses. *Anal Chem.*  
1039 2012;84(17):7469-78.
- 1040 98. McAlister GC, Nusinow DP, Jedrychowski MP, Wuhr M, Huttlin EL, Erickson BK, et al. MultiNotch  
1041 MS3 enables accurate, sensitive, and multiplexed detection of differential expression across  
1042 cancer cell line proteomes. *Anal Chem.* 2014;86(14):7150-8.
- 1043 99. Elias JE, Gygi SP. Target-decoy search strategy for increased confidence in large-scale protein  
1044 identifications by mass spectrometry. *Nat Methods.* 2007;4(3):207-14.
- 1045 100. Elias JE, Gygi SP. Target-decoy search strategy for mass spectrometry-based proteomics. *Methods*  
1046 *Mol Biol.* 2010;604:55-71.
- 1047 101. Kim W, Bennett EJ, Huttlin EL, Guo A, Li J, Possemato A, et al. Systematic and quantitative  
1048 assessment of the ubiquitin-modified proteome. *Mol Cell.* 2011;44(2):325-40.
- 1049 102. Wu R, Dephore N, Haas W, Huttlin EL, Zhai B, Sowa ME, et al. Correct interpretation of  
1050 comprehensive phosphorylation dynamics requires normalization by protein expression changes.  
1051 *Mol Cell Proteomics.* 2011;10(8):M111 009654.
- 1052 103. Huttlin EL, Jedrychowski MP, Elias JE, Goswami T, Rad R, Beausoleil SA, et al. A tissue-specific atlas  
1053 of mouse protein phosphorylation and expression. *Cell.* 2010;143(7):1174-89.

- 1054 104. Kall L, Canterbury JD, Weston J, Noble WS, MacCoss MJ. Semi-supervised learning for peptide  
1055 identification from shotgun proteomics datasets. *Nat Methods*. 2007;4(11):923-5.  
1056 105. Makarov A, Denisov E. Dynamics of ions of intact proteins in the Orbitrap mass analyzer. *J Am Soc*  
1057 *Mass Spectrom*. 2009;20(8):1486-95.  
1058 106. Ting L, Rad R, Gygi SP, Haas W. MS3 eliminates ratio distortion in isobaric multiplexed quantitative  
1059 proteomics. *Nat Methods*. 2011;8(11):937-40.  
1060 107. van der Ploeg K, Chang C, Ivarsson MA, Moffett A, Wills MR, Trowsdale J. Modulation of Human  
1061 Leukocyte Antigen-C by Human Cytomegalovirus Stimulates KIR2DS1 Recognition by Natural  
1062 Killer Cells. *Front Immunol*. 2017;8:298.  
1063 108. Parkinson JE, Smith GL. Vaccinia virus gene A36R encodes a M(r) 43-50 K protein on the surface  
1064 of extracellular enveloped virus. *Virology*. 1994;204(1):376-90.  
1065 109. Harris CR, Millman KJ, van der Walt SJ, Gommers R, Virtanen P, Cournapeau D, et al. Array  
1066 programming with NumPy. *Nature*. 2020;585(7825):357-62.  
1067 110. McKinney W, editor *Data structures for statistical computing in Python*. 9th Pythn in Science  
1068 Conference (SciPy, 2010); 2010.  
1069 111. Hunter JD. Matplotlib: A 2D graphics environment. *Comput Sci Eng*. 2007;9(3):90-5.  
1070 112. Virtanen P, Gommers R, Oliphant TE, Haberland M, Reddy T, Cournapeau D, et al. SciPy 1.0:  
1071 fundamental algorithms for scientific computing in Python. *Nat Methods*. 2020;17(3):261-72.  
1072 113. Pedregosa F, Varoquaux G, Gramfort A, Michel V, Thirion B, Grisel O, et al. Scikit-learn: Machine  
1073 Learning in Python. *J Mach Learn Res*. 2011;12:2825-30.

1074

1075 **Supplementary information**

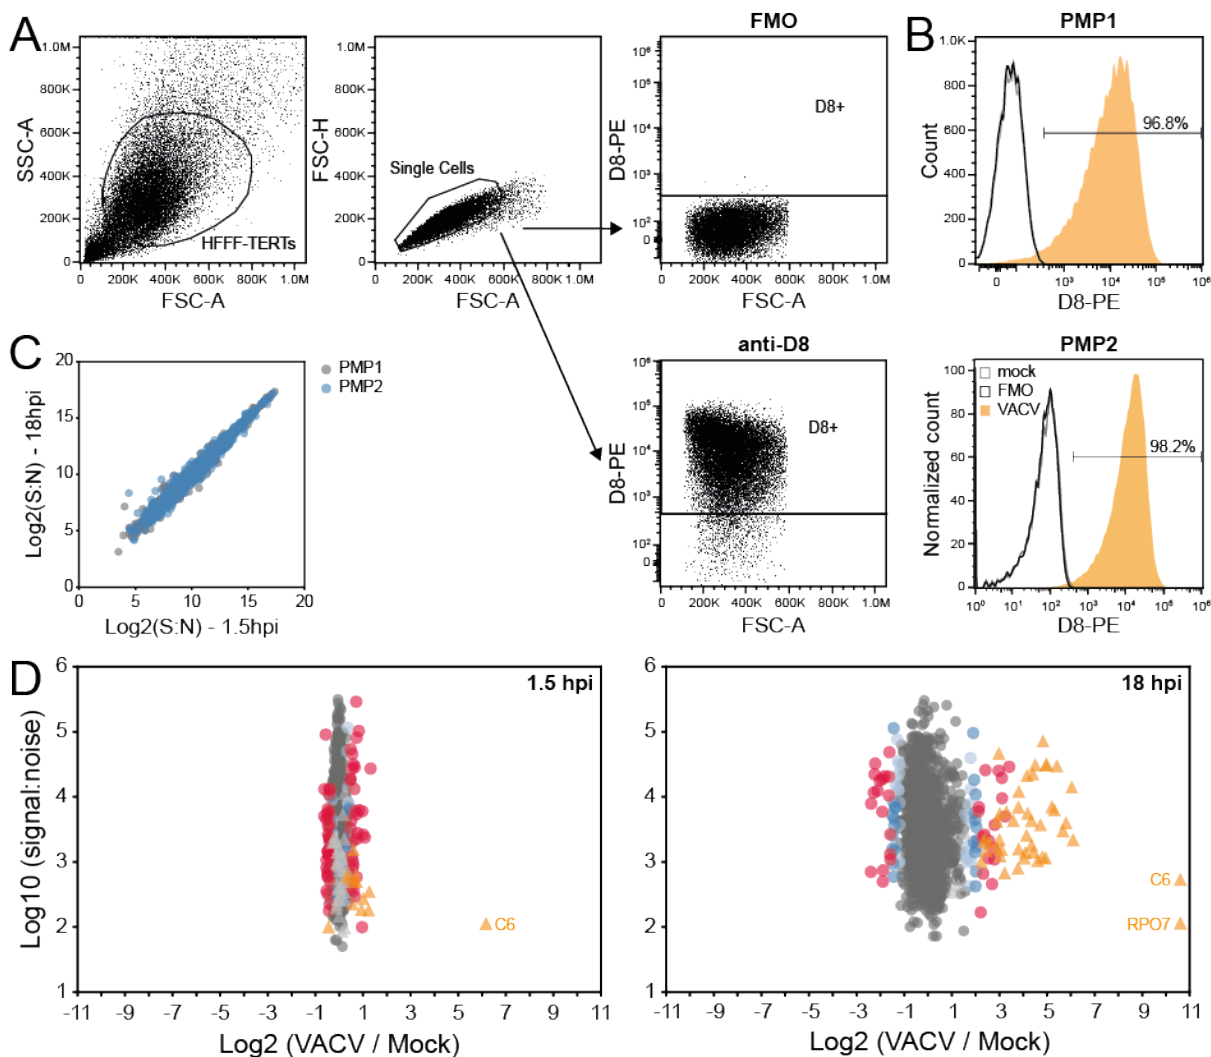

1076

1077

1078

1079

1080

1081

1082

1083

1084

1085

1086

1087

**Figure S1. Technical details of the proteomic plasma membrane profiling experiments.** Related to Figure 1. (A-B) HFFF-TERTs were mock-treated or infected with VACV at MOI 5 in parallel with infections for PMP. At 15.5 hpi samples were fixed and stained for the late VACV protein D8 to assess infection levels. (A) Representative gating strategy of VACV-infected cells stained with anti-D8 followed by anti-mouse-PE or with the secondary antibody only (fluorescence minus one, FMO) as a control. Viable cells and single cells were gated followed by selection of D8-positive cells. (B) D8 levels in mock-treated or VACV-infected cells for each of the two biological repeats. (C) Correlation of protein abundance (signal: noise, S: N) of mock-treated samples at 1.5 h and 18 h per replicate. A single human protein was excluded from PMP2 because the abundance in mock samples was '0'. (D) Fold-change of VACV and human PM proteins quantified in both repeats. Scale of the x-axis was not limited (as in Figure 1D) to include VACV proteins C6 and RPO7, which are considered outliers based on their function and subcellular localisation.



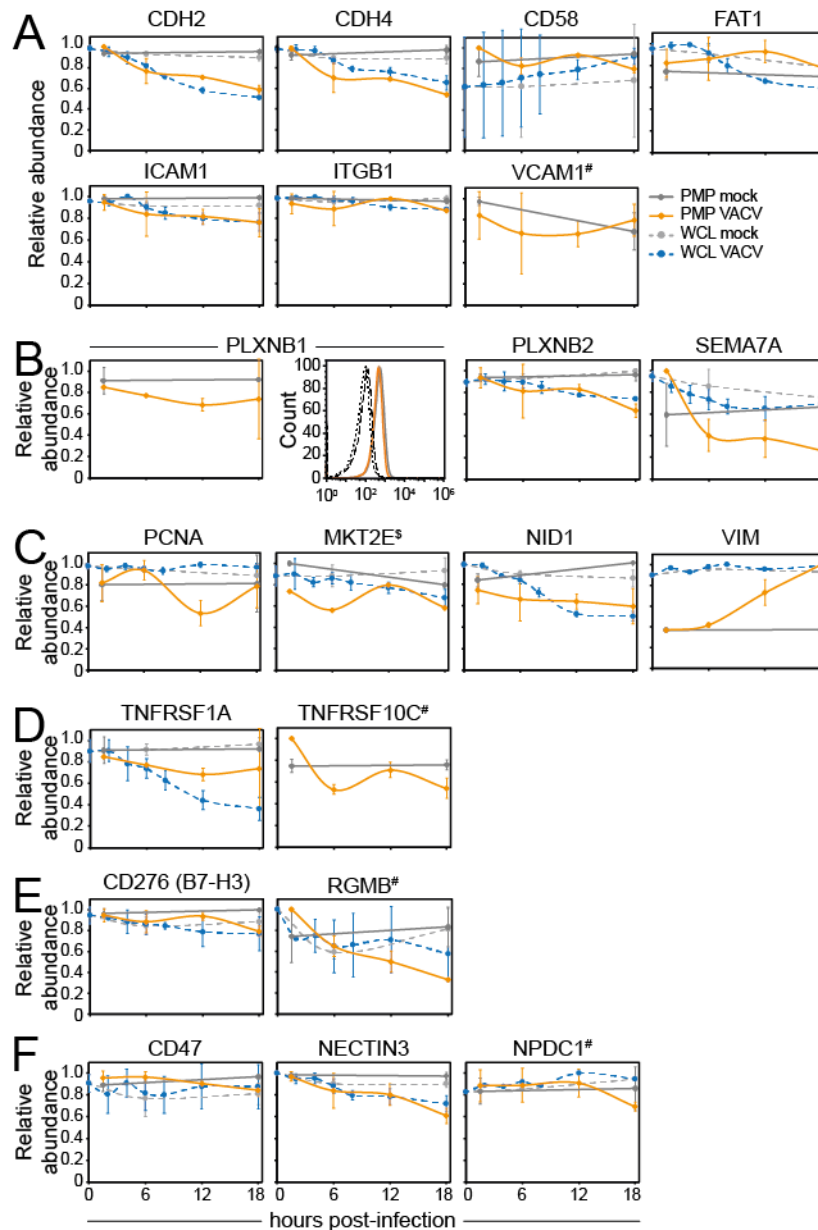

1088

1089

1090

1091

1092

1093

1094

**Figure S2. Cell surface expression of NK/T cell ligands during VACV infection.** Related to Figure 4. Temporal profiles of known NK/T cell ligands. **(A)** Adhesion molecules. **(B)** Plexins. **(C)** Natural cytotoxicity triggering receptor (NCR) ligands. **(D)** Apoptosis regulators. **(E)** Co-inhibitory/stimulatory molecules. **(F)** Other. Data are represented as mean  $\pm$  SD (PMP n=2, \$PMP n=1; WCL (9) n=3, #WCL < n=3). **(B)** Downregulation of plexin B1 during VACV infection was confirmed by flow cytometry in HeLa cells at 15 hpi with VACV (MOI 5). Results are representative of at least 2 independent experiments.

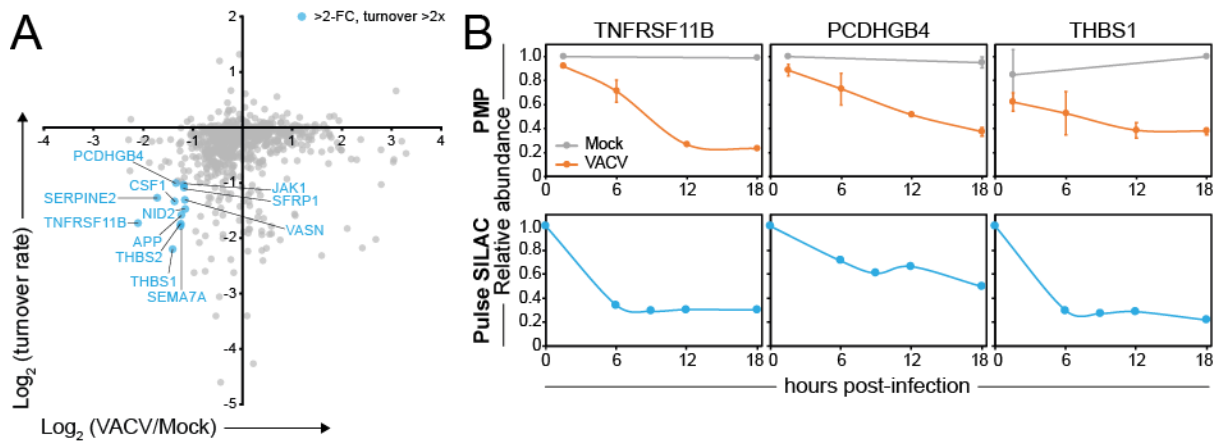

1095

1096

1097

1098

1099

1100

**Figure S3. Downregulation of human PM proteins due to high protein turnover.** (A) Identification of human PM proteins  $>2$ -fold downregulated at 18 hpi after VACV infection (compared to 18 h mock) and for which the protein abundance decreased  $>2$ -fold in 18 h was determined in a previous pulse (p)SILAC screen in mock-treated HFFF-TERTs (30). (B) Temporal profile of selected host proteins downregulated from the cell surface during VACV infection and which have a short half-life. Data are represented as mean  $\pm$  SD (PMP  $n=2$ ; pSILAC  $n=1$  (30)).

1101 **Table S1. Interactive spreadsheet of all data in the manuscript.** Related to Figures 2-9 & S2. The 'Plotter'  
1102 worksheet enables the generation of graphs for all human and viral proteins quantified. The 'Data original'  
1103 worksheet contains minimally annotated protein data where the raw data has been modified by formatting and  
1104 normalisation. The 'Data' worksheet the HLA-A, -B, -C data is based only on peptides uniquely attributed to these  
1105 three HLA subtypes. The spreadsheets include data obtained in previously performed WCL proteomics (9).  
1106

1107 **Table S2. Plasma membrane proteins modulated during VACV infection.** Related to Figure 2. **(A-D)** Human  
1108 PM proteins (A/C) downregulated or (B/D) upregulated according to (A-B) 'sensitive' or (C-D) 'stringent' criteria. **(E-**  
1109 **F)** DAVID functional enrichment analysis of proteins shown in (A) or (B), respectively, compared to all quantified  
1110 human PM proteins.  
1111

1112 **Table S3. Discovery of putative immune ligands using InterPro domain annotation.** Related to Figure 5.  
1113 InterPro functional domain annotation of proteins (A) downregulated or (B) upregulated according to 'sensitive'  
1114 criteria.  
1115

1116 **Table S4. Systematic analysis of mechanism underlying protein modulation during VACV infection.** Related  
1117 to Figures 7&S3. **(A)** Human PM proteins quantified in both repeats and on average >2-fold downregulated  
1118 compared to 18 h mock, in combination with p-value <0.05 and RR >1.5. **(B)** Human PM proteins quantified in both  
1119 repeats and on average >2-fold upregulated compared to 18 h mock, in combination with p-value <0.05 and RR  
1120 <0.66. **(C)** Human PM proteins quantified in both repeats and on average >2-fold downregulated compared to 18  
1121 h mock, in combination with p-value <0.05 and >2-fold pSILAC turnover rate in 18 h (30). P-values on the fold-  
1122 change at 18 hpi was estimated using the method of significance A and corrected for multiple hypothesis testing  
1123 (32).  
1124

1125 **Table S5. Comparison of protein expression at whole cell level and at the plasma membrane during VACV**  
1126 **infection.** Related to Figure 8. **(A)** Human PM proteins downregulated in both PMP and WCL experiments (9)  
1127 using 'sensitive' criteria. **(B)** Human PM proteins downregulated in PMP but not WCL using 'sensitive' criteria. **(C)**  
1128 DAVID functional enrichment analysis of proteins shown in (A), compared to all human PM proteins quantified in  
1129 at least one replicate of PMP and WCL. **(D)** Human PM proteins upregulated in both PMP and WCL using 'sensitive'  
1130 criteria. **(E)** Human PM proteins upregulated in PMP but not WCL using 'sensitive' criteria.  
1131

1132 **Table S6. Human PM protein regulation by VACV and HCMV.** Related to Figure 9. **(A/C)** All human PM proteins  
1133 (A) downregulated or (C) upregulated >2-fold by both VACV and HCMV (29) according to 'sensitive' criteria. **(B/D)**  
1134 DAVID functional enrichment of proteins shown in (A) and (C), respectively, compared to all proteins quantified in  
1135 both VACV and HCMV PMP screens.
